# Supplementary material
Source: publisher figshare collection journal article supplement (https://acs.figshare.com/ndownloader/files/18041300)
Supplement: Supplementary file 1 [file 18041300]

## Sheet: Data Set 1
Data Set 1. Potential candidate genes around significant QTLs associated with 13 elemental accumulation.
Region	Year	GWAS trait	SNP_ID	Chr	Pos	Gene start	Gene end	Gene name or putative function	Annotation	Function or biological process	Full annotation
around significant QTL	2008	B	AX-176796824	15	2744431	2407710	2410684	Name=arahy.8TW6PJ	RING-H2 zinc finger protein	metal-binding; regulation of phosphate transport	ID=arahy.Tifrunner.gnm1.ann1.8TW6PJ;Name=arahy.8TW6PJ;Dbxref=Gene3D:G3DSA:3.30.40.10,InterPro:IPR001841,InterPro:IPR013083,PANTHER:PTHR14155,Pfam:PF13639,Prosite:PS50089,SMART:SM00184,Superfamily:SSF57850;Ontology_term=GO:0005515,GO:0008270;Note=RING-H2 zinc finger protein%3B IPR013083 (Zinc finger%2C RING/FYVE/PHD-type)%3B GO:0005515 (protein binding)%2C GO:0008270 (zinc ion binding)
around significant QTL	2008	B	AX-176796824	15	2744431	2458756	2462846	Name=arahy.Q0IN0Q	Urea active transport protein n	transmembrane transport; transporter activity	ID=arahy.Tifrunner.gnm1.ann1.Q0IN0Q;Name=arahy.Q0IN0Q;Dbxref=Coils:Coil,InterPro:IPR001734,InterPro:IPR019900,JCVI_TIGRFAMS:TIGR00813,PANTHER:PTHR11819,PANTHER:PTHR11819:SF15,Pfam:PF00474,Prosite:PS50283;Ontology_term=GO:0005215,GO:0006810,GO:0016020,GO:0055085;Note=Urea active transport protein n%3D1 Tax%3DSpathaspora passalidarum (strain NRRL Y-27907 / 11-Y1) RepID%3DG3AFR7_SPAPN%3B IPR001734 (…
around significant QTL	2008	B	AX-176796824	15	2744431	2539040	2544526	Name=arahy.N8H2I0	zinc finger protein	metal ion binding	ID=arahy.Tifrunner.gnm1.ann1.N8H2I0;Name=arahy.N8H2I0;Dbxref=Gene3D:G3DSA:4.10.1050.10,InterPro:IPR007087,InterPro:IPR026939,PANTHER:PTHR21213,PANTHER:PTHR21213:SF0,Pfam:PF12907,Prosite:PS00028,Prosite:PS50157,Superfamily:SSF118359;Ontology_term=GO:0046872;Note=zinc finger protein%2C putative%3B IPR007087 (Zinc finger%2C C2H2)%2C IPR026939 (Zinc finger protein 706)%3B GO:0046872 (metal ion bindin…
around significant QTL	2008	B	AX-176796824	15	2744431	2675143	2680104	Name=arahy.STSP6P	RING-H2 finger protein 2B	zinc ion binding	ID=arahy.Tifrunner.gnm1.ann1.STSP6P;Name=arahy.STSP6P;Dbxref=Gene3D:G3DSA:3.30.40.10,InterPro:IPR001841,InterPro:IPR013083,PANTHER:PTHR14155,Pfam:PF13639,Prosite:PS50089,SMART:SM00184,Superfamily:SSF57850;Ontology_term=GO:0005515,GO:0008270;Note=RING-H2 finger protein 2B%3B IPR013083 (Zinc finger%2C RING/FYVE/PHD-type)%3B GO:0005515 (protein binding)%2C GO:0008270 (zinc ion binding)
around significant QTL	2008	B	AX-176796824	15	2744431	2950902	2953828	Name=arahy.0Y92P4	Cytochrome P450 superfamily protein	iron binding	ID=arahy.Tifrunner.gnm1.ann1.0Y92P4;Name=arahy.0Y92P4;Dbxref=Gene3D:G3DSA:1.10.630.10,InterPro:IPR001128,InterPro:IPR002401,InterPro:IPR017972,PANTHER:PTHR24286,PANTHER:PTHR24286:SF10,PRINTS:PR00385,PRINTS:PR00463,Pfam:PF00067,Prosite:PS00086,Superfamily:SSF48264;Ontology_term=GO:0005506,GO:0016705,GO:0020037,GO:0055114;Note=Cytochrome P450 superfamily protein%3B IPR001128 (Cytochrome P450)%3B GO…
around significant QTL	2008	B	AX-176796824	15	2744431	3015629	3020932	Name=arahy.I7HRAK	ATP-binding ABC transporter	transmembrane transport; ion transport	ID=arahy.Tifrunner.gnm1.ann1.I7HRAK;Name=arahy.I7HRAK;Dbxref=Gene3D:G3DSA:3.40.50.300,InterPro:IPR003439,InterPro:IPR003593,InterPro:IPR007209,InterPro:IPR013283,InterPro:IPR017871,InterPro:IPR027417,PANTHER:PTHR19248,PANTHER:PTHR19248:SF9,PRINTS:PR01868,Pfam:PF00005,Pfam:PF04068,Prosite:PS00211,Prosite:PS50893,SMART:SM00382,Superfamily:SSF52540;Ontology_term=GO:0000166,GO:0005524,GO:0016887,GO:0…
around significant QTL	2008	B	AX-176796824	15	2744431	3034624	3038081	Name=arahy.Y0J304	zinc knuckle (CCHC-type) family protein	zinc ion binding	ID=arahy.Tifrunner.gnm1.ann1.Y0J304;Name=arahy.Y0J304;Dbxref=InterPro:IPR019339,PANTHER:PTHR24015,PANTHER:PTHR24015:SF90,Pfam:PF10197,SMART:SM01083;Note=zinc knuckle (CCHC-type) family protein%3B IPR019339 (CBF1-interacting co-repressor CIR%2C N-terminal domain)
around significant QTL	2008	B	AX-176796824	15	2744431	3045044	3048240	Name=arahy.NJU12A	ATP-binding cassette 14 n	anion transmembrane transporter activity; ABC-2 type transporter	ID=arahy.Tifrunner.gnm1.ann1.NJU12A;Name=arahy.NJU12A;Dbxref=Coils:Coil,Gene3D:G3DSA:3.40.50.300,InterPro:IPR003439,InterPro:IPR003593,InterPro:IPR013525,InterPro:IPR017871,InterPro:IPR027417,PANTHER:PTHR19241,PANTHER:PTHR19241:SF23,Pfam:PF00005,Pfam:PF01061,Prosite:PS00211,Prosite:PS50893,SMART:SM00382,Superfamily:SSF52540;Ontology_term=GO:0000166,GO:0005524,GO:0016020,GO:0016887,GO:0017111;Note…
around significant QTL	2008	B	AX-176796824	15	2744431	3095760	3099016	Name=arahy.C9JWVP	nodulin MtN21 /EamA-like transporter family protein	transmembrane transporter activity	ID=arahy.Tifrunner.gnm1.ann1.C9JWVP;Name=arahy.C9JWVP;Dbxref=InterPro:IPR000620,PANTHER:PTHR31218,PANTHER:PTHR31218:SF5,Pfam:PF00892,Superfamily:SSF103481;Ontology_term=GO:0016020;Note=nodulin MtN21 /EamA-like transporter family protein%3B IPR000620 (Drug/metabolite transporter)%3B GO:0016020 (membrane)
around significant QTL	2008	B	AX-176796824	15	2744431	3102279	3107979	Name=arahy.FQMW2S	nodulin MtN21 /EamA-like transporter family protein	transmembrane transporter activity	ID=arahy.Tifrunner.gnm1.ann1.FQMW2S;Name=arahy.FQMW2S;Dbxref=InterPro:IPR000620,PANTHER:PTHR31218,PANTHER:PTHR31218:SF5,Pfam:PF00892,Superfamily:SSF103481;Ontology_term=GO:0016020;Note=nodulin MtN21 /EamA-like transporter family protein%3B IPR000620 (Drug/metabolite transporter)%3B GO:0016020 (membrane)
around significant QTL	2008	B	AX-176796824	15	2744431	3123066	3127064	Name=arahy.VP531Q	nodulin MtN21 /EamA-like transporter family protein	transmembrane transporter activity	ID=arahy.Tifrunner.gnm1.ann1.VP531Q;Name=arahy.VP531Q;Dbxref=InterPro:IPR000620,PANTHER:PTHR31218,PANTHER:PTHR31218:SF5,Pfam:PF00892,Superfamily:SSF103481;Ontology_term=GO:0016020;Note=nodulin MtN21 /EamA-like transporter family protein%3B IPR000620 (Drug/metabolite transporter)%3B GO:0016020 (membrane)
around significant QTL	2008	B	AX-176796824	15	2744431	3182704	3185673	Name=arahy.H0876V	nine-cis-epoxycarotenoid dioxygenase 4	metal ion binding	ID=arahy.Tifrunner.gnm1.ann1.H0876V;Name=arahy.H0876V;Dbxref=InterPro:IPR004294,PANTHER:PTHR10543,PANTHER:PTHR10543:SF1,Pfam:PF03055;Note=nine-cis-epoxycarotenoid dioxygenase 4%3B IPR004294 (Carotenoid oxygenase)
around significant QTL	2008	B	AX-176796824	15	2744431	3220210	3224801	Name=arahy.8K9MAC	protein serine/threonine kinases	magnesium ion binding	ID=arahy.Tifrunner.gnm1.ann1.8K9MAC;Name=arahy.8K9MAC;Dbxref=Gene3D:G3DSA:1.10.510.10,Gene3D:G3DSA:2.60.120.200,Gene3D:G3DSA:3.30.200.20,InterPro:IPR000719,InterPro:IPR001220,InterPro:IPR002290,InterPro:IPR008271,InterPro:IPR008985,InterPro:IPR011009,InterPro:IPR013320,InterPro:IPR017441,InterPro:IPR019825,PANTHER:PTHR24420,Pfam:PF00069,Pfam:PF00139,Prosite:PS00107,Prosite:PS00108,Prosite:PS00307…
around significant QTL	2008	B	AX-176796824	15	2744431	3236964	3240627	Name=arahy.UD965C	protein serine/threonine kinases	magnesium ion binding	ID=arahy.Tifrunner.gnm1.ann1.UD965C;Name=arahy.UD965C;Dbxref=Gene3D:G3DSA:1.10.510.10,Gene3D:G3DSA:2.60.120.200,Gene3D:G3DSA:3.30.200.20,InterPro:IPR000719,InterPro:IPR001220,InterPro:IPR002290,InterPro:IPR008271,InterPro:IPR008985,InterPro:IPR011009,InterPro:IPR013320,InterPro:IPR017441,InterPro:IPR019825,PANTHER:PTHR24420,Pfam:PF00069,Pfam:PF00139,Prosite:PS00107,Prosite:PS00108,Prosite:PS00307…
around significant QTL	2008	B	AX-177639090	8	46464022	45962718	45965308	Name=arahy.U52AAS	sulfate transporter-like protein	ion transport; sulfate transmembrane transport	ID=arahy.Tifrunner.gnm1.ann1.U52AAS;Name=arahy.U52AAS;Dbxref=InterPro:IPR011547,PANTHER:PTHR31970,PANTHER:PTHR31970:SF0,Pfam:PF00916;Ontology_term=GO:0008272,GO:0015116,GO:0016021;Note=sulfate transporter-like protein%3B IPR011547 (Sulphate transporter)%3B GO:0008272 (sulfate transport)%2C GO:0015116 (sulfate transmembrane transporter activity)%2C GO:0016021 (integral component of membrane)
around significant QTL	2008	B	AX-177639090	8	46464022	45975005	45980677	Name=arahy.7CLK78	probable ADP-ribosylation factor GTPase-activating protein AGD14-like isoform X4 [Glycine max]	metal ion binding; zinc ion binding	ID=arahy.Tifrunner.gnm1.ann1.7CLK78;Name=arahy.7CLK78;Dbxref=Coils:Coil,InterPro:IPR001164,PANTHER:PTHR23180,PANTHER:PTHR23180:SF58,PRINTS:PR00405,Pfam:PF01412,Prosite:PS50115,SMART:SM00105,Superfamily:SSF57863;Ontology_term=GO:0008060,GO:0008270,GO:0032312;Note=probable ADP-ribosylation factor GTPase-activating protein AGD14-like isoform X4 [Glycine max]%3B IPR001164 (Arf GTPase activating prote…
around significant QTL	2008	B	AX-177639090	8	46464022	46007439	46011489	Name=arahy.JYH77Y	Oxygen-evolving complex-related (ISS) n	calcium ion binding	ID=arahy.Tifrunner.gnm1.ann1.JYH77Y;Name=arahy.JYH77Y;Dbxref=Gene3D:G3DSA:3.40.1000.10,InterPro:IPR002683,InterPro:IPR016123,Pfam:PF01789,Superfamily:SSF55724;Ontology_term=GO:0005509,GO:0009523,GO:0009654,GO:0015979,GO:0019898;Note=Oxygen-evolving complex-related (ISS) n%3D1 Tax%3DOstreococcus tauri RepID%3DQ00V85_OSTTA%3B IPR002683 (Photosystem II PsbP%2C oxygen evolving complex)%3B GO:0005509 …
around significant QTL	2008	B	AX-177639090	8	46464022	46130658	46136039	Name=arahy.0DMM9R	RNA-binding protein 8A-like [Glycine max]	metal ion binding	ID=arahy.Tifrunner.gnm1.ann1.0DMM9R;Name=arahy.0DMM9R;Dbxref=Coils:Coil,Gene3D:G3DSA:3.30.70.330,Gene3D:G3DSA:4.10.1000.10,InterPro:IPR000504,InterPro:IPR000571,InterPro:IPR012677,PANTHER:PTHR23139,PANTHER:PTHR23139:SF48,Pfam:PF00076,Pfam:PF00642,Prosite:PS50102,Prosite:PS50103,SMART:SM00356,SMART:SM00360,Superfamily:SSF54928,Superfamily:SSF90229;Ontology_term=GO:0000166,GO:0003676,GO:0046872;Not…
around significant QTL	2008	B	AX-177639090	8	46464022	46448720	46449954	Name=arahy.M39DKM	terpene synthase 21	magnesium ion binding	ID=arahy.Tifrunner.gnm1.ann1.M39DKM;Name=arahy.M39DKM;Dbxref=Gene3D:G3DSA:1.10.600.10,InterPro:IPR005630,InterPro:IPR008949,PANTHER:PTHR31045,PANTHER:PTHR31045:SF0,Pfam:PF03936,Superfamily:SSF48576;Ontology_term=GO:0000287,GO:0010333,GO:0016829;Note=terpene synthase 21%3B IPR008949 (Terpenoid synthase)%3B GO:0000287 (magnesium ion binding)%2C GO:0010333 (terpene synthase activity)%2C GO:0016829 (…
around significant QTL	2008	B	AX-177639090	8	46464022	46616522	46621552	Name=arahy.2L480B	cytosolic Fe-S cluster assembly factor NUBP1-like protein	metal ion binding; iron-sulfur cluster binding	ID=arahy.Tifrunner.gnm1.ann1.2L480B;Name=arahy.2L480B;Dbxref=Gene3D:G3DSA:3.40.50.300,HAMAP:MF_03038,InterPro:IPR000808,InterPro:IPR019591,InterPro:IPR025723,InterPro:IPR027417,InterPro:IPR028601,PANTHER:PTHR23264,PANTHER:PTHR23264:SF8,Pfam:PF02374,Pfam:PF10609,Prosite:PS01215,Superfamily:SSF52540;Ontology_term=GO:0005524,GO:0016226,GO:0051536,GO:0051539;Note=cytosolic Fe-S cluster assembly facto…
around significant QTL	2008	B	AX-177639090	8	46464022	46649158	46655376	Name=arahy.6E0KX6	Anion exchanger family protein n	Plasma membrane anion exchange	ID=arahy.Tifrunner.gnm1.ann1.6E0KX6;Name=arahy.6E0KX6;Dbxref=Gene3D:G3DSA:1.10.287.570,InterPro:IPR003020,InterPro:IPR011531,PANTHER:PTHR11453,PANTHER:PTHR11453:SF6,Pfam:PF00955;Ontology_term=GO:0005452,GO:0006820,GO:0016020,GO:0016021;Note=Anion exchanger family protein n%3D1 Tax%3DMedicago truncatula RepID%3DG7JBM4_MEDTR%3B IPR003020 (Bicarbonate transporter%2C eukaryotic)%3B GO:0005452 (inorga…
around significant QTL	2008	B	AX-177639090	8	46464022	46659737	46664072	Name=arahy.BA35D7	Anion exchanger family protein n	Plasma membrane anion exchange	ID=arahy.Tifrunner.gnm1.ann1.BA35D7;Name=arahy.BA35D7;Dbxref=Gene3D:G3DSA:1.10.287.570,InterPro:IPR003020,InterPro:IPR011531,PANTHER:PTHR11453,PANTHER:PTHR11453:SF6,Pfam:PF00955;Ontology_term=GO:0005452,GO:0006820,GO:0016020,GO:0016021;Note=Anion exchanger family protein n%3D1 Tax%3DMedicago truncatula RepID%3DG7JBM4_MEDTR%3B IPR003020 (Bicarbonate transporter%2C eukaryotic)%3B GO:0005452 (inorga…
around significant QTL	2008	B	AX-177639090	8	46464022	46664960	46671181	Name=arahy.42MX75	cyclic nucleotide-gated ion channel 1-like isoform X4 [Glycine max]	potassium ion transport; transmembrane transport	ID=arahy.Tifrunner.gnm1.ann1.42MX75;Name=arahy.42MX75;Dbxref=Gene3D:G3DSA:1.10.287.630,Gene3D:G3DSA:1.10.287.70,Gene3D:G3DSA:1.25.40.20,Gene3D:G3DSA:2.60.120.10,InterPro:IPR000595,InterPro:IPR002110,InterPro:IPR003938,InterPro:IPR005821,InterPro:IPR014710,InterPro:IPR018490,InterPro:IPR020683,InterPro:IPR021789,PANTHER:PTHR10217,PANTHER:PTHR10217:SF463,PRINTS:PR01415,PRINTS:PR01463,Pfam:PF00027,P…
around significant QTL	2008	B	AX-177639090	8	46464022	46914757	46918692	Name=arahy.HIL042	mitochondrial substrate carrier family protein B-like [Glycine max]	transmembrane transport	ID=arahy.Tifrunner.gnm1.ann1.HIL042;Name=arahy.HIL042;Dbxref=Gene3D:G3DSA:1.50.40.10,InterPro:IPR002067,InterPro:IPR018108,InterPro:IPR023395,PANTHER:PTHR24089,PANTHER:PTHR24089:SF92,PRINTS:PR00926,Pfam:PF00153,Prosite:PS50920,Superfamily:SSF103506;Ontology_term=GO:0055085;Note=mitochondrial substrate carrier family protein B-like [Glycine max]%3B IPR002067 (Mitochondrial carrier protein)%2C IPR0…
around significant QTL	2008	B	AX-176805153	5	37939243	37623101	37624225	Name=arahy.WI178G	Zinc knuckle family protein n	zinc ion binding	ID=arahy.Tifrunner.gnm1.ann1.WI178G;Name=arahy.WI178G;Dbxref=Coils:Coil;Note=Zinc knuckle family protein n%3D1 Tax%3DOryza sativa subsp. japonica RepID%3DH2KWL4_ORYSJ
around significant QTL	2008	B	AX-176805153	5	37939243	38261798	38269757	Name=arahy.PFVK4Y	RING/FYVE/PHD zinc finger superfamily protein	metal ion binding	ID=arahy.Tifrunner.gnm1.ann1.PFVK4Y;Name=arahy.PFVK4Y;Dbxref=Gene3D:G3DSA:3.30.40.10,InterPro:IPR001965,InterPro:IPR011011,InterPro:IPR013083,InterPro:IPR019787,PANTHER:PTHR22880,PANTHER:PTHR22880:SF78,Prosite:PS50016,SMART:SM00249,Superfamily:SSF57903;Ontology_term=GO:0005515,GO:0008270;Note=RING/FYVE/PHD zinc finger superfamily protein%3B IPR013083 (Zinc finger%2C RING/FYVE/PHD-type)%3B GO:0005…
around significant QTL	2008	B	AX-176811365	16	120407913	120494151	120496985	Name=arahy.UW2U2R	zinc finger CCCH domain-containing protein 34-like [Glycine max]	metal ion binding	ID=arahy.Tifrunner.gnm1.ann1.UW2U2R;Name=arahy.UW2U2R;Dbxref=Gene3D:G3DSA:4.10.1000.10,InterPro:IPR000571,PANTHER:PTHR12506,PANTHER:PTHR12506:SF11,Pfam:PF00642,Prosite:PS50103,Superfamily:SSF90229;Ontology_term=GO:0046872;Note=zinc finger CCCH domain-containing protein 34-like [Glycine max]%3B IPR000571 (Zinc finger%2C CCCH-type)%3B GO:0046872 (metal ion binding)
around significant QTL	2008	B	AX-176807782	4	28916478	2840549	2844727	Name=arahy.XUW287	Sec23/Sec24 protein transport family protein	zinc ion binding	ID=arahy.Tifrunner.gnm1.ann1.XUW287;Name=arahy.XUW287;Dbxref=Coils:Coil,Gene3D:G3DSA:2.60.40.1670,Gene3D:G3DSA:3.40.20.10,Gene3D:G3DSA:3.40.50.410,InterPro:IPR002035,InterPro:IPR006895,InterPro:IPR006896,InterPro:IPR006900,InterPro:IPR007123,InterPro:IPR012990,PANTHER:PTHR11141,Pfam:PF00626,Pfam:PF04810,Pfam:PF04811,Pfam:PF04815,Pfam:PF08033,Superfamily:SSF53300,Superfamily:SSF81811,Superfamily:S…
around significant QTL	2008	B	AX-147221822	5	11648360	1197334	1204395	Name=arahy.5666S0	ATP-binding ABC transporter	transmembrane transport; ion transport	ID=arahy.Tifrunner.gnm1.ann1.5666S0;Name=arahy.5666S0;Dbxref=Gene3D:G3DSA:1.20.1560.10,Gene3D:G3DSA:3.40.50.300,InterPro:IPR001140,InterPro:IPR003439,InterPro:IPR003593,InterPro:IPR011527,InterPro:IPR017871,InterPro:IPR027417,PANTHER:PTHR24221,PANTHER:PTHR24221:SF24,Pfam:PF00005,Pfam:PF00664,Prosite:PS00211,Prosite:PS50893,Prosite:PS50929,SMART:SM00382,Superfamily:SSF52540,Superfamily:SSF90123;On…
around significant QTL	2008	B	AX-176819753	6	2770952	2539391	2544492	Name=arahy.5G1Q9A	cyclic nucleotide-gated ion channel-like protein	ion transport; transmembrane transport	ID=arahy.Tifrunner.gnm1.ann1.5G1Q9A;Name=arahy.5G1Q9A;Dbxref=Coils:Coil,Gene3D:G3DSA:1.10.287.630,Gene3D:G3DSA:1.10.287.70,Gene3D:G3DSA:2.60.120.10,InterPro:IPR000595,InterPro:IPR005821,InterPro:IPR014710,InterPro:IPR018490,PANTHER:PTHR10217,PANTHER:PTHR10217:SF465,Pfam:PF00027,Pfam:PF00520,Prosite:PS50042,SMART:SM00100,Superfamily:SSF51206,Superfamily:SSF81324;Ontology_term=GO:0005216,GO:0006811…
around significant QTL	2008	B	AX-176819753	6	2770952	2884486	2885988	Name=arahy.3647Q9	zinc finger MYM-type protein 1-like [Glycine max]	zinc ion binding	ID=arahy.Tifrunner.gnm1.ann1.3647Q9;Name=arahy.3647Q9;Dbxref=InterPro:IPR025398,PANTHER:PTHR11697,PANTHER:PTHR11697:SF74,Pfam:PF14291;Note=zinc finger MYM-type protein 1-like [Glycine max]%3B IPR025398 (Domain of unknown function DUF4371)
around significant QTL	2008	B	AX-176812225	7	68200564	68670070	68671613	Name=arahy.VY8QPP	zinc finger MYM-type protein 1-like [Glycine max]	zinc ion binding	ID=arahy.Tifrunner.gnm1.ann1.VY8QPP;Name=arahy.VY8QPP;Dbxref=InterPro:IPR006580,InterPro:IPR012337,PANTHER:PTHR11697,PANTHER:PTHR11697:SF74,SMART:SM00597,Superfamily:SSF53098;Ontology_term=GO:0003676;Note=zinc finger MYM-type protein 1-like [Glycine max]%3B IPR006580 (Zinc finger%2C TTF-type)%2C IPR012337 (Ribonuclease H-like domain)%3B GO:0003676 (nucleic acid binding)
around significant QTL	2008	B	AX-176822945	1	38241684	38614969	38620200	Name=arahy.7W2QL6	Nodulin MtN21 /EamA-like transporter family protein	transmembrane transport	ID=arahy.Tifrunner.gnm1.ann1.7W2QL6;Name=arahy.7W2QL6;Dbxref=InterPro:IPR000620,PANTHER:PTHR31218,PANTHER:PTHR31218:SF0,Pfam:PF00892;Ontology_term=GO:0016020;Note=Nodulin MtN21 /EamA-like transporter family protein%3B IPR000620 (Drug/metabolite transporter)%3B GO:0016020 (membrane)
around significant QTL	2009	B	AX-176813315	10	98891152	99237013	99238881	Name=arahy.MV37LX	GATA transcription factor 12	zinc ion binding	ID=arahy.Tifrunner.gnm1.ann1.MV37LX;Name=arahy.MV37LX;Dbxref=Gene3D:G3DSA:3.30.50.10,InterPro:IPR000679,InterPro:IPR013088,InterPro:IPR016679,PANTHER:PTHR10071,PIR:PIRSF016992,Pfam:PF00320,Prosite:PS00344,Prosite:PS50114,SMART:SM00401,Superfamily:SSF57716;Ontology_term=GO:0003677,GO:0003700,GO:0005634,GO:0006355,GO:0008270,GO:0043565,GO:0045893;Note=GATA transcription factor 12%3B IPR016679 (Tran…
around significant QTL	2009	B	AX-176808916	10	100279481	100061480	100068475	Name=arahy.JB5G6S	nucleolin 1-like [Glycine max]	zinc ion binding	ID=arahy.Tifrunner.gnm1.ann1.JB5G6S;Name=arahy.JB5G6S;Dbxref=Coils:Coil,Gene3D:G3DSA:4.10.60.10,InterPro:IPR001878,Pfam:PF00098,Pfam:PF01107,Prosite:PS50158,SMART:SM00343,Superfamily:SSF56672,Superfamily:SSF57756;Ontology_term=GO:0003676,GO:0008270;Note=nucleolin 1-like [Glycine max]%3B IPR001878 (Zinc finger%2C CCHC-type)%3B GO:0003676 (nucleic acid binding)%2C GO:0008270 (zinc ion binding)
around significant QTL	2009	B	AX-176808916	10	100279481	100614758	100616647	Name=arahy.UGG0Q6	lactoylglutathione lyase	metal ion binding	ID=arahy.Tifrunner.gnm1.ann1.UGG0Q6;Name=arahy.UGG0Q6;Dbxref=Gene3D:G3DSA:3.10.180.10,InterPro:IPR004360,InterPro:IPR004361,InterPro:IPR018146,JCVI_TIGRFAMS:TIGR00068,PANTHER:PTHR10374,PANTHER:PTHR10374:SF0,Pfam:PF00903,Prosite:PS00934,Superfamily:SSF54593;Ontology_term=GO:0004462,GO:0046872;Note=lactoylglutathione lyase%3B IPR004360 (Glyoxalase/fosfomycin resistance/dioxygenase domain)%2C IPR004…
around significant QTL	2009	B	AX-177637256	20	123606294	123838921	123841106	Name=arahy.MGTB4W	lactoylglutathione lyase	metal ion binding	ID=arahy.Tifrunner.gnm1.ann1.MGTB4W;Name=arahy.MGTB4W;Dbxref=Gene3D:G3DSA:3.10.180.10,InterPro:IPR004360,InterPro:IPR004361,InterPro:IPR018146,JCVI_TIGRFAMS:TIGR00068,PANTHER:PTHR10374,PANTHER:PTHR10374:SF0,Pfam:PF00903,Prosite:PS00934,Superfamily:SSF54593;Ontology_term=GO:0004462,GO:0046872;Note=lactoylglutathione lyase%3B IPR004360 (Glyoxalase/fosfomycin resistance/dioxygenase domain)%2C IPR004…
around significant QTL	2009	B	AX-177637256	20	123606294	124041836	124045716	Name=arahy.I3V9I7	CTV.20 n	heme binding, iron ion binding	ID=arahy.Tifrunner.gnm1.ann1.I3V9I7;Name=arahy.I3V9I7;Dbxref=Coils:Coil,Gene3D:G3DSA:4.10.60.10,InterPro:IPR001878,Pfam:PF01107,Prosite:PS50158,SMART:SM00343,Superfamily:SSF57756;Ontology_term=GO:0003676,GO:0008270;Note=CTV.20 n%3D1 Tax%3DPoncirus trifoliata RepID%3DQ8H6Q8_PONTR%3B IPR001878 (Zinc finger%2C CCHC-type)%3B GO:0003676 (nucleic acid binding)%2C GO:0008270 (zinc ion binding)
around significant QTL	2009	B	AX-177637256	20	123606294	124050221	124051313	Name=arahy.WK2R97	CTV.20 n	heme binding, iron ion binding	ID=arahy.Tifrunner.gnm1.ann1.WK2R97;Name=arahy.WK2R97;Note=CTV.20 n%3D1 Tax%3DPoncirus trifoliata RepID%3DQ8H6Q8_PONTR
around significant QTL	2009	B	AX-176822513	20	126166995	125886188	125892804	Name=arahy.LJ0T63	hemoglobin 3	heme binding, iron ion binding	ID=arahy.Tifrunner.gnm1.ann1.LJ0T63;Name=arahy.LJ0T63;Dbxref=Gene3D:G3DSA:1.10.490.10,InterPro:IPR001486,InterPro:IPR009050,InterPro:IPR012292,Pfam:PF01152,Superfamily:SSF46458;Ontology_term=GO:0005506,GO:0015671,GO:0019825,GO:0020037;Note=hemoglobin 3%3B IPR001486 (Globin%2C truncated bacterial-like)%2C IPR009050 (Globin-like)%3B GO:0005506 (iron ion binding)%2C GO:0015671 (oxygen transport)%2C …
around significant QTL	2009	B	AX-176813037	5	3452826	2950902	2953828	Name=arahy.YRF88J	Cytochrome P450 superfamily protein	iron binding	ID=arahy.Tifrunner.gnm1.ann1.YRF88J;Name=arahy.YRF88J;Dbxref=Gene3D:G3DSA:1.10.630.10,InterPro:IPR001128,InterPro:IPR002401,InterPro:IPR017972,PANTHER:PTHR24286,PANTHER:PTHR24286:SF10,PRINTS:PR00385,PRINTS:PR00463,Pfam:PF00067,Prosite:PS00086,Superfamily:SSF48264;Ontology_term=GO:0005506,GO:0016705,GO:0020037,GO:0055114;Note=Cytochrome P450 superfamily protein%3B IPR001128 (Cytochrome P450)%3B GO…
around significant QTL	2009	B	AX-176813037	5	3452826	3034624	3038081	Name=arahy.0U4NMV	zinc knuckle (CCHC-type) family protein	zinc ion binding	ID=arahy.Tifrunner.gnm1.ann1.0U4NMV;Name=arahy.0U4NMV;Dbxref=InterPro:IPR019339,PANTHER:PTHR24015,PANTHER:PTHR24015:SF90,Pfam:PF10197,SMART:SM01083;Note=zinc knuckle (CCHC-type) family protein%3B IPR019339 (CBF1-interacting co-repressor CIR%2C N-terminal domain)
around significant QTL	2009	B	AX-176813037	5	3452826	3290127	3293851	Name=arahy.32WLBW	Auxin efflux carrier family protein	transmembrane transport	ID=arahy.Tifrunner.gnm1.ann1.32WLBW;Name=arahy.32WLBW;Dbxref=InterPro:IPR004776,PANTHER:PTHR31651,PANTHER:PTHR31651:SF0,Pfam:PF03547;Ontology_term=GO:0016021,GO:0055085;Note=Auxin efflux carrier family protein%3B IPR004776 (Auxin efflux carrier)%3B GO:0016021 (integral component of membrane)%2C GO:0055085 (transmembrane transport)
around significant QTL	2009	B	AX-176813037	5	3452826	3401198	3410884	Name=arahy.YI11AC	MORC family CW-type zinc finger protein 3-like isoform X2 [Glycine max]	ATP binding, zinc ion binding	ID=arahy.Tifrunner.gnm1.ann1.YI11AC;Name=arahy.YI11AC;Dbxref=Gene3D:G3DSA:3.30.565.10,InterPro:IPR003594,InterPro:IPR011124,PANTHER:PTHR23336,PANTHER:PTHR23336:SF2,Pfam:PF07496,Pfam:PF13589,Prosite:PS51050,Superfamily:SSF55874;Ontology_term=GO:0005524,GO:0008270;Note=MORC family CW-type zinc finger protein 3-like isoform X2 [Glycine max]%3B IPR003594 (Histidine kinase-like ATPase%2C ATP-binding d…
around significant QTL	2009	B	AX-176813037	5	3452826	3465610	3466305	Name=arahy.Q758V8	RING/U-box superfamily protein	zinc ion binding	ID=arahy.Tifrunner.gnm1.ann1.Q758V8;Name=arahy.Q758V8;Dbxref=Gene3D:G3DSA:3.30.40.10,InterPro:IPR001841,InterPro:IPR013083,PANTHER:PTHR22764,Pfam:PF13639,Prosite:PS50089,SMART:SM00184,Superfamily:SSF57850;Ontology_term=GO:0005515,GO:0008270;Note=RING/U-box superfamily protein%3B IPR013083 (Zinc finger%2C RING/FYVE/PHD-type)%3B GO:0005515 (protein binding)%2C GO:0008270 (zinc ion binding)
around significant QTL	2009	B	AX-176813037	5	3452826	3498854	3505754	Name=arahy.07LUT5	Auxin efflux carrier family protein	transmembrane transport	ID=arahy.Tifrunner.gnm1.ann1.07LUT5;Name=arahy.07LUT5;Dbxref=InterPro:IPR004776,PANTHER:PTHR31651,PANTHER:PTHR31651:SF0,Pfam:PF03547;Ontology_term=GO:0016021,GO:0055085;Note=Auxin efflux carrier family protein%3B IPR004776 (Auxin efflux carrier)%3B GO:0016021 (integral component of membrane)%2C GO:0055085 (transmembrane transport)
around significant QTL	2009	B	AX-176813037	5	3452826	3879725	3882389	Name=arahy.62X1XK	zinc finger (C2H2 type) family protein	metal ion binding	ID=arahy.Tifrunner.gnm1.ann1.62X1XK;Name=arahy.62X1XK;Dbxref=InterPro:IPR007087,Prosite:PS00028;Ontology_term=GO:0046872;Note=zinc finger (C2H2 type) family protein%3B IPR007087 (Zinc finger%2C C2H2)%3B GO:0046872 (metal ion binding)
around significant QTL	2009	B	AX-176813037	5	3452826	3896765	3897643	Name=arahy.JYQV5P	zinc finger (C2H2 type) family protein	metal ion binding	ID=arahy.Tifrunner.gnm1.ann1.JYQV5P;Name=arahy.JYQV5P;Dbxref=InterPro:IPR007087,Prosite:PS00028;Ontology_term=GO:0046872;Note=zinc finger (C2H2 type) family protein%3B IPR007087 (Zinc finger%2C C2H2)%3B GO:0046872 (metal ion binding)
around significant QTL	2009	B	AX-176807810	5	4995364	4520304	4520621	Name=arahy.9VMU04	heavy metal-associated isoprenylated plant protein 26 [Glycine max]	metal ion transport	ID=arahy.Tifrunner.gnm1.ann1.9VMU04;Name=arahy.9VMU04;Dbxref=Gene3D:G3DSA:3.30.70.100,PANTHER:PTHR22814,PANTHER:PTHR22814:SF14;Note=heavy metal-associated isoprenylated plant protein 26 [Glycine max]
around significant QTL	2009	B	AX-176807810	5	4995364	4793411	4798484	Name=arahy.I66G12	calcium-dependent protein kinase 28	calcium ion binding	ID=arahy.Tifrunner.gnm1.ann1.I66G12;Name=arahy.I66G12;Dbxref=Gene3D:G3DSA:1.10.238.10,Gene3D:G3DSA:1.10.510.10,Gene3D:G3DSA:3.30.200.20,InterPro:IPR000719,InterPro:IPR002048,InterPro:IPR002290,InterPro:IPR008271,InterPro:IPR011009,InterPro:IPR011992,InterPro:IPR017441,InterPro:IPR018247,PANTHER:PTHR24349,PANTHER:PTHR24349:SF23,Pfam:PF00069,Pfam:PF13499,Prosite:PS00018,Prosite:PS00107,Prosite:PS00…
around significant QTL	2009	B	AX-176807810	5	4995364	4841430	4844536	Name=arahy.X9BMMP	MYB transcription factor MYB93 [Glycine max]	zinc ion binding	ID=arahy.Tifrunner.gnm1.ann1.X9BMMP;Name=arahy.X9BMMP;Dbxref=Gene3D:G3DSA:1.10.10.60,InterPro:IPR001005,InterPro:IPR001878,InterPro:IPR006447,InterPro:IPR009057,InterPro:IPR017930,JCVI_TIGRFAMS:TIGR01557,PANTHER:PTHR31243,PANTHER:PTHR31243:SF0,Pfam:PF00249,Prosite:PS50158,Prosite:PS51294,SMART:SM00717,Superfamily:SSF46689;Ontology_term=GO:0003676,GO:0003677,GO:0003682,GO:0008270;Note=MYB transcri…
around significant QTL	2009	B	AX-176807810	5	4995364	5232680	5235322	Name=arahy.5GRT4L	calcineurin B-like protein 1	calcium ion binding	ID=arahy.Tifrunner.gnm1.ann1.5GRT4L;Name=arahy.5GRT4L;Dbxref=Gene3D:G3DSA:1.10.238.10,InterPro:IPR002048,InterPro:IPR011992,InterPro:IPR018247,PANTHER:PTHR23056,PANTHER:PTHR23056:SF3,Pfam:PF13499,Prosite:PS00018,Prosite:PS50222,SMART:SM00054,Superfamily:SSF47473;Ontology_term=GO:0005509;Note=calcineurin B-like protein 1%3B IPR011992 (EF-hand domain pair)%3B GO:0005509 (calcium ion binding)
around significant QTL	2009	B	AX-176807810	5	4995364	5347111	5350935	Name=arahy.Y6VK3W	probable BOI-related E3 ubiquitin-protein ligase 3-like isoform X2 [Glycine max]	zinc ion binding	ID=arahy.Tifrunner.gnm1.ann1.Y6VK3W;Name=arahy.Y6VK3W;Dbxref=Coils:Coil,Gene3D:G3DSA:3.30.40.10,InterPro:IPR001841,InterPro:IPR013083,InterPro:IPR017066,PANTHER:PTHR14493,PANTHER:PTHR14493:SF21,PIR:PIRSF036836,Pfam:PF13920,Prosite:PS50089;Ontology_term=GO:0005515,GO:0008270;Note=probable BOI-related E3 ubiquitin-protein ligase 3-like isoform X2 [Glycine max]%3B IPR013083 (Zinc finger%2C RING/FYVE…
around significant QTL	2009	B	AX-147223338	5	95428609	95513444	95513874	Name=arahy.QZ4CZK	probable plastidic glucose transporter 3-like isoform X3 [Glycine max]	transmembrane transporter activity	ID=arahy.Tifrunner.gnm1.ann1.QZ4CZK;Name=arahy.QZ4CZK;Dbxref=Gene3D:G3DSA:1.20.1250.20,InterPro:IPR005828,InterPro:IPR016196,InterPro:IPR020846,PANTHER:PTHR24063,PANTHER:PTHR24063:SF2,Pfam:PF00083,Prosite:PS50850,Superfamily:SSF103473;Ontology_term=GO:0016021,GO:0022857,GO:0055085;Note=probable plastidic glucose transporter 3-like isoform X3 [Glycine max]%3B IPR005828 (General substrate transport…
around significant QTL	2009	B	AX-147223338	5	95428609	95858032	95867745	Name=arahy.8B3CAL	ATP-binding ABC transporter	transmembrane transport; ion transport	ID=arahy.Tifrunner.gnm1.ann1.8B3CAL;Name=arahy.8B3CAL;Dbxref=Gene3D:G3DSA:1.20.1560.10,Gene3D:G3DSA:3.40.50.300,InterPro:IPR001140,InterPro:IPR003439,InterPro:IPR003593,InterPro:IPR011527,InterPro:IPR017871,InterPro:IPR027417,PANTHER:PTHR24221,PANTHER:PTHR24221:SF24,Pfam:PF00005,Pfam:PF00664,Prosite:PS00211,Prosite:PS50893,Prosite:PS50929,SMART:SM00382,Superfamily:SSF52540,Superfamily:SSF90123;On…
around significant QTL	2009	B	AX-176822513	20	126166995	126454801	126459889	Name=arahy.Z0EWEF	bZIP transcription factor family protein	sequence-specific DNA binding	ID=arahy.Tifrunner.gnm1.ann1.Z0EWEF;Name=arahy.Z0EWEF;Dbxref=Coils:Coil,Gene3D:G3DSA:1.20.5.170,InterPro:IPR004827,InterPro:IPR020983,PANTHER:PTHR22952,PANTHER:PTHR22952:SF58,Pfam:PF00170,Pfam:PF12498,Prosite:PS00036,Prosite:PS50217,SMART:SM00338,Superfamily:SSF57959;Ontology_term=GO:0003700,GO:0006355,GO:0043565;Note=bZIP transcription factor family protein%3B IPR004827 (Basic-leucine zipper dom…
around significant QTL	2008	B	AX-176812225	7	68200564	67976084	67980130	Name=arahy.XP10PA	GTP binding Elongation factor Tu family protein	GTP binding	ID=arahy.Tifrunner.gnm1.ann1.XP10PA;Name=arahy.XP10PA;Dbxref=Gene3D:G3DSA:2.40.30.10,Gene3D:G3DSA:3.30.230.10,Gene3D:G3DSA:3.30.70.240,Gene3D:G3DSA:3.30.70.870,Gene3D:G3DSA:3.40.50.300,Gene3D:G3DSA:3.90.1430.10,InterPro:IPR000640,InterPro:IPR000795,InterPro:IPR004161,InterPro:IPR005225,InterPro:IPR005517,InterPro:IPR009000,InterPro:IPR009022,InterPro:IPR014721,InterPro:IPR020568,InterPro:IPR02741…
around significant QTL	2009	B	AX-176822513	20	126166995	125911898	125915665	Name=arahy.D73BWA	uncharacterized protein LOC100807597 [Glycine max]		ID=arahy.Tifrunner.gnm1.ann1.D73BWA;Name=arahy.D73BWA;Dbxref=Coils:Coil,InterPro:IPR006867,InterPro:IPR006868,PANTHER:PTHR21450,PANTHER:PTHR21450:SF0,Pfam:PF04782,Pfam:PF04783;Note=uncharacterized protein LOC100807597 [Glycine max]%3B IPR006867 (Domain of unknown function DUF632)%2C IPR006868 (Domain of unknown function DUF630)
around significant QTL	2008	B	AX-176811365	16	120407913	120150883	120155334	Name=arahy.7VP81J	Uncharacterized conserved protein (DUF2215)	transmembrane protein	ID=arahy.Tifrunner.gnm1.ann1.7VP81J;Name=arahy.7VP81J;Dbxref=InterPro:IPR019358,PANTHER:PTHR31587,PANTHER:PTHR31587:SF0,Pfam:PF10225;Note=Uncharacterized conserved protein (DUF2215)%3B IPR019358 (Transmembrane protein 194)
around significant QTL	2009	B	AX-147223338	5	95428609	95575951	95579732	Name=arahy.YT3TY8	hexokinase 1	regulation of anion channel activity	ID=arahy.Tifrunner.gnm1.ann1.YT3TY8;Name=arahy.YT3TY8;Dbxref=Gene3D:G3DSA:3.30.420.40,Gene3D:G3DSA:3.40.367.20,InterPro:IPR001312,InterPro:IPR022672,InterPro:IPR022673,PANTHER:PTHR19443,PRINTS:PR00475,Pfam:PF00349,Pfam:PF03727,Superfamily:SSF53067;Ontology_term=GO:0005524,GO:0005975,GO:0016773;Note=hexokinase 1%3B IPR001312 (Hexokinase)%3B GO:0005524 (ATP binding)%2C GO:0005975 (carbohydrate meta…
around significant QTL	2009	B	AX-147223338	5	95428609	95894044	95902626	Name=arahy.J0ZPIQ	ATP-binding ABC transporter	transmembrane transport; ion transport	ID=arahy.Tifrunner.gnm1.ann1.J0ZPIQ;Name=arahy.J0ZPIQ;Dbxref=Gene3D:G3DSA:1.20.1560.10,Gene3D:G3DSA:3.40.50.300,InterPro:IPR001140,InterPro:IPR003439,InterPro:IPR003593,InterPro:IPR011527,InterPro:IPR017871,InterPro:IPR027417,PANTHER:PTHR24221,PANTHER:PTHR24221:SF24,Pfam:PF00005,Pfam:PF00664,Prosite:PS00211,Prosite:PS50893,Prosite:PS50929,SMART:SM00382,Superfamily:SSF52540,Superfamily:SSF90123;On…
around significant QTL	2008	Cu	AX-176822716	19	17238282	17593343	17599074	Name=arahy.15EC9B	PHD finger protein ALFIN-LIKE 4-like [Glycine max]	zinc ion binding	ID=arahy.Tifrunner.gnm1.ann1.15EC9B;Name=arahy.15EC9B;Dbxref=Coils:Coil,Gene3D:G3DSA:3.30.40.10,InterPro:IPR001965,InterPro:IPR011011,InterPro:IPR013083,InterPro:IPR019786,InterPro:IPR019787,InterPro:IPR021998,PANTHER:PTHR12321,PANTHER:PTHR12321:SF12,Pfam:PF00628,Pfam:PF12165,Prosite:PS01359,Prosite:PS50016,SMART:SM00249,Superfamily:SSF57903;Ontology_term=GO:0005515,GO:0006355,GO:0008270,GO:00423…
around significant QTL	2008	Cu	AX-177639274	19	20128062	19833450	19837091	Name=arahy.85G0UF	Cytochrome P450 superfamily protein	iron binding	ID=arahy.Tifrunner.gnm1.ann1.85G0UF;Name=arahy.85G0UF;Dbxref=Gene3D:G3DSA:1.10.630.10,InterPro:IPR001128,InterPro:IPR002401,InterPro:IPR017972,PANTHER:PTHR24298,PANTHER:PTHR24298:SF2,PRINTS:PR00385,PRINTS:PR00463,Pfam:PF00067,Prosite:PS00086,Superfamily:SSF48264;Ontology_term=GO:0005506,GO:0016705,GO:0020037,GO:0055114;Note=Cytochrome P450 superfamily protein%3B IPR001128 (Cytochrome P450)%3B GO:…
around significant QTL	2008	Cu	AX-177639274	19	20128062	19863267	19867023	Name=arahy.DBZ9PS	Cytochrome P450 superfamily protein	iron binding	ID=arahy.Tifrunner.gnm1.ann1.DBZ9PS;Name=arahy.DBZ9PS;Dbxref=Gene3D:G3DSA:1.10.630.10,InterPro:IPR001128,InterPro:IPR002401,InterPro:IPR017972,PANTHER:PTHR24298,PANTHER:PTHR24298:SF2,PRINTS:PR00385,PRINTS:PR00463,Pfam:PF00067,Prosite:PS00086,Superfamily:SSF48264;Ontology_term=GO:0005506,GO:0016705,GO:0020037,GO:0055114;Note=Cytochrome P450 superfamily protein%3B IPR001128 (Cytochrome P450)%3B GO:…
around significant QTL	2008	Cu	AX-177639274	19	20128062	19972841	19978526	Name=arahy.A1W2LU	cytochrome P450	iron binding	ID=arahy.Tifrunner.gnm1.ann1.A1W2LU;Name=arahy.A1W2LU;Dbxref=Gene3D:G3DSA:1.10.630.10,InterPro:IPR001128,Pfam:PF00067,Superfamily:SSF48264;Ontology_term=GO:0005506,GO:0016705,GO:0020037,GO:0055114;Note=cytochrome P450%2C family 706%2C subfamily A%2C polypeptide 4%3B IPR001128 (Cytochrome P450)%3B GO:0005506 (iron ion binding)%2C GO:0020037 (heme binding)%2C GO:0055114 (oxidation-reduction process)
around significant QTL	2008	Cu	AX-176822716	19	17238282	16846337	16852302	Name=arahy.W7NSCD	developmentally regulated GTP-binding protein	GTP binding	ID=arahy.Tifrunner.gnm1.ann1.W7NSCD;Name=arahy.W7NSCD;Dbxref=Gene3D:G3DSA:3.40.50.300,InterPro:IPR004095,InterPro:IPR005225,InterPro:IPR006073,InterPro:IPR006074,InterPro:IPR012676,InterPro:IPR027417,JCVI_TIGRFAMS:TIGR00231,PANTHER:PTHR11702,PANTHER:PTHR11702:SF7,PRINTS:PR00326,Pfam:PF01926,Pfam:PF02824,Prosite:PS00905,Superfamily:SSF52540,Superfamily:SSF81271;Ontology_term=GO:0005525;Note=develo…
around significant QTL	2008	Cu	AX-176822716	19	17238282	17283166	17288084	Name=arahy.3YA759	protein Brevis radix-like 2-like isoform X2 [Glycine max]		ID=arahy.Tifrunner.gnm1.ann1.3YA759;Name=arahy.3YA759;Dbxref=InterPro:IPR013591,InterPro:IPR027988,PANTHER:PTHR22870,PANTHER:PTHR22870:SF25,Pfam:PF08381,Pfam:PF13713,Prosite:PS51514;Note=protein Brevis radix-like 2-like isoform X2 [Glycine max]%3B IPR013591 (Brevis radix (BRX) domain)%2C IPR027988 (Transcription factor BREVIS RADIX%2C N-terminal domain)
around significant QTL	2008	Cu	AX-177639274	19	20128062	20106111	20114740	Name=arahy.E27NE4	exportin 1A	binding	ID=arahy.Tifrunner.gnm1.ann1.E27NE4;Name=arahy.E27NE4;Dbxref=Gene3D:G3DSA:1.25.10.10,InterPro:IPR011989,InterPro:IPR013598,InterPro:IPR016024,PANTHER:PTHR15952,PANTHER:PTHR15952:SF11,Pfam:PF08389,Superfamily:SSF48371;Ontology_term=GO:0005488;Note=exportin 1A%3B IPR016024 (Armadillo-type fold)%3B GO:0005488 (binding)
around significant QTL	2008	Na	AX-147238042	11	12432001	12362832	12363704	Name=arahy.C4DNWM	probable peptide/nitrate transporter [Glycine max]	potassium transport	ID=arahy.Tifrunner.gnm1.ann1.C4DNWM;Name=arahy.C4DNWM;Dbxref=InterPro:IPR000109,Pfam:PF00854;Ontology_term=GO:0005215,GO:0006810,GO:0016020;Note=probable peptide/nitrate transporter [Glycine max]%3B IPR000109 (Proton-dependent oligopeptide transporter family)%3B GO:0005215 (transporter activity)%2C GO:0006810 (transport)%2C GO:0016020 (membrane)
around significant QTL	2008	Na	AX-147238042	11	12432001	12786730	12787911	Name=arahy.GWP2TD	RING-H2 finger protein 2B	zinc ion binding	ID=arahy.Tifrunner.gnm1.ann1.GWP2TD;Name=arahy.GWP2TD;Dbxref=Gene3D:G3DSA:3.30.40.10,InterPro:IPR001841,InterPro:IPR013083,PANTHER:PTHR22763,PANTHER:PTHR22763:SF0,Pfam:PF13639,Pfam:PF14369,Prosite:PS50089,SMART:SM00184,Superfamily:SSF57850;Ontology_term=GO:0005515,GO:0008270;Note=RING-H2 finger protein 2B%3B IPR013083 (Zinc finger%2C RING/FYVE/PHD-type)%3B GO:0005515 (protein binding)%2C GO:00082…
around significant QTL	2008	Na	AX-147221598	5	6323091	5945057	5945923	Name=arahy.H3I6IK	zinc finger protein 6-like [Glycine max]	metal ion binding	ID=arahy.Tifrunner.gnm1.ann1.H3I6IK;Name=arahy.H3I6IK;Dbxref=InterPro:IPR007087,InterPro:IPR015880,PANTHER:PTHR26374,PANTHER:PTHR26374:SF123,Pfam:PF13912,Prosite:PS00028,Prosite:PS50157,SMART:SM00355,Superfamily:SSF57667;Ontology_term=GO:0046872;Note=zinc finger protein 6-like [Glycine max]%3B IPR015880 (Zinc finger%2C C2H2-like)%3B GO:0046872 (metal ion binding)
around significant QTL	2008	Na	AX-147221598	5	6323091	6016878	6018070	Name=arahy.Z6F81U	RING/FYVE/PHD zinc finger superfamily protein	zinc ion binding	ID=arahy.Tifrunner.gnm1.ann1.Z6F81U;Name=arahy.Z6F81U;Dbxref=Gene3D:G3DSA:3.30.40.10,InterPro:IPR001965,InterPro:IPR011011,InterPro:IPR013083,InterPro:IPR019787,PANTHER:PTHR22880,PANTHER:PTHR22880:SF78,Pfam:PF00628,SMART:SM00249,Superfamily:SSF57903;Ontology_term=GO:0005515,GO:0008270;Note=RING/FYVE/PHD zinc finger superfamily protein%3B IPR013083 (Zinc finger%2C RING/FYVE/PHD-type)%3B GO:0005515…
around significant QTL	2008	Na	AX-147221598	5	6323091	6018778	6019246	Name=arahy.0S7EH6	RING/FYVE/PHD zinc finger superfamily protein	zinc ion binding	ID=arahy.Tifrunner.gnm1.ann1.0S7EH6;Name=arahy.0S7EH6;Note=RING/FYVE/PHD zinc finger superfamily protein
around significant QTL	2008	Na	AX-147219784	4	27963468	28054895	28063909	Name=arahy.JB3EIK	plasma membrane H+-ATPase	cation transport	ID=arahy.Tifrunner.gnm1.ann1.JB3EIK;Name=arahy.JB3EIK;Dbxref=Coils:Coil,Gene3D:G3DSA:1.20.1110.10,Gene3D:G3DSA:2.70.150.10,Gene3D:G3DSA:3.40.1110.10,InterPro:IPR001757,InterPro:IPR004014,InterPro:IPR006534,InterPro:IPR008250,InterPro:IPR018303,InterPro:IPR023214,InterPro:IPR023298,InterPro:IPR023299,JCVI_TIGRFAMS:TIGR01494,JCVI_TIGRFAMS:TIGR01647,PANTHER:PTHR24093,PANTHER:PTHR24093:SF127,PRINTS:P…
around significant QTL	2008	Na	AX-147246850	14	5481262	5413913	5417353	Name=arahy.KQD4NT	Heavy metal transport/detoxification superfamily protein	metal ion transport, metal ion binding	ID=arahy.Tifrunner.gnm1.ann1.KQD4NT;Name=arahy.KQD4NT;Dbxref=Gene3D:G3DSA:3.30.70.100,InterPro:IPR006121,PANTHER:PTHR22814,PANTHER:PTHR22814:SF33,Pfam:PF00403,Prosite:PS50846,Superfamily:SSF55008;Ontology_term=GO:0030001,GO:0046872;Note=Heavy metal transport/detoxification superfamily protein%3B IPR006121 (Heavy metal-associated domain%2C HMA)%3B GO:0030001 (metal ion transport)%2C GO:0046872 (me…
around significant QTL	2008	Na	AX-147246850	14	5481262	5543904	5544342	Name=arahy.603WQA	ABC transporter C family member 3-like isoform X1 [Glycine max]	transmembrane transport	ID=arahy.Tifrunner.gnm1.ann1.603WQA;Name=arahy.603WQA;Dbxref=Gene3D:G3DSA:3.40.50.300,InterPro:IPR003439,InterPro:IPR027417,PANTHER:PTHR24223,PANTHER:PTHR24223:SF106,Pfam:PF00005,Superfamily:SSF52540;Ontology_term=GO:0005524,GO:0016887;Note=ABC transporter C family member 3-like isoform X1 [Glycine max]%3B IPR027417 (P-loop containing nucleoside triphosphate hydrolase)%3B GO:0005524 (ATP binding)…
around significant QTL	2008	Na	AX-147246850	14	5481262	5937389	5944818	Name=arahy.747ND8	MATE efflux family protein	transmembrane transport	ID=arahy.Tifrunner.gnm1.ann1.747ND8;Name=arahy.747ND8;Dbxref=InterPro:IPR002528,JCVI_TIGRFAMS:TIGR00797,PANTHER:PTHR11206,PANTHER:PTHR11206:SF21,Pfam:PF01554;Ontology_term=GO:0006855,GO:0015238,GO:0015297,GO:0016020,GO:0055085;Note=MATE efflux family protein%3B IPR002528 (Multi antimicrobial extrusion protein)%3B GO:0006855 (drug transmembrane transport)%2C GO:0015238 (drug transmembrane transpor…
around significant QTL	2008	Na	AX-147254196	16	135069925	135080595	135081190	Name=arahy.KR957Y	Zinc knuckle family protein n	transcription factor binding	ID=arahy.Tifrunner.gnm1.ann1.KR957Y;Name=arahy.KR957Y;Dbxref=Gene3D:G3DSA:3.20.20.190,InterPro:IPR017946;Ontology_term=GO:0006629,GO:0008081;Note=Zinc knuckle family protein n%3D1 Tax%3DSolanum demissum RepID%3DQ6L424_SOLDE%3B IPR017946 (PLC-like phosphodiesterase%2C TIM beta/alpha-barrel domain)%3B GO:0006629 (lipid metabolic process)%2C GO:0008081 (phosphoric diester hydrolase activity)
around significant QTL	2008	Na	AX-147254196	16	135069925	135081206	135082583	Name=arahy.ZXT3TZ	Zinc knuckle family protein n	transcription factor binding	ID=arahy.Tifrunner.gnm1.ann1.ZXT3TZ;Name=arahy.ZXT3TZ;Dbxref=Coils:Coil;Note=Zinc knuckle family protein n%3D1 Tax%3DOryza sativa subsp. japonica RepID%3DH2KWL4_ORYSJ
around significant QTL	2008	Na	AX-147254196	16	135069925	135386956	135389129	Name=arahy.Q0SVNI	zinc finger (C3HC4-type RING finger) family protein	zinc ion binding, metal ion binding	ID=arahy.Tifrunner.gnm1.ann1.Q0SVNI;Name=arahy.Q0SVNI;Dbxref=Gene3D:G3DSA:3.30.40.10,InterPro:IPR001841,InterPro:IPR013083,InterPro:IPR017907,InterPro:IPR018957,PANTHER:PTHR23328,PANTHER:PTHR23328:SF0,Pfam:PF00097,Prosite:PS00518,Prosite:PS50089,SMART:SM00184,Superfamily:SSF57850;Ontology_term=GO:0005515,GO:0008270,GO:0046872;Note=zinc finger (C3HC4-type RING finger) family protein%3B IPR013083 (…
around significant QTL	2008	Na	AX-147221598	5	6323091	6607150	6611478	Name=arahy.4QJM49	glycosyl hydrolase family protein 43	carbohydrate metabolic process	ID=arahy.Tifrunner.gnm1.ann1.4QJM49;Name=arahy.4QJM49;Dbxref=Gene3D:G3DSA:2.115.10.20,InterPro:IPR006710,InterPro:IPR023296,PANTHER:PTHR22925,PANTHER:PTHR22925:SF3,Pfam:PF04616,Superfamily:SSF75005;Ontology_term=GO:0004553,GO:0005975;Note=glycosyl hydrolase family protein 43%3B IPR006710 (Glycoside hydrolase%2C family 43)%2C IPR023296 (Glycosyl hydrolase%2C five-bladed beta-propellor domain)%3B G…
around significant QTL	2008	Na	AX-147219784	4	27963468	28255371	28259398	Name=arahy.G1RM5S	Iron-sulfur cluster assembly protein n	iron ion binding, iron-sulfur cluster binding	ID=arahy.Tifrunner.gnm1.ann1.G1RM5S;Name=arahy.G1RM5S;Dbxref=InterPro:IPR001075,PANTHER:PTHR11178,PANTHER:PTHR11178:SF5,Pfam:PF01106,Superfamily:SSF117916;Ontology_term=GO:0005506,GO:0016226,GO:0051536;Note=Iron-sulfur cluster assembly protein n%3D1 Tax%3DCoccomyxa subellipsoidea C-169 RepID%3DI0Z8L0_9CHLO%3B IPR001075 (NIF system FeS cluster assembly%2C NifU%2C C-terminal)%3B GO:0005506 (iron io…
around significant QTL	2008	Na	AX-147238042	11	12432001	12239679	12244215	Name=arahy.WSU996	uncharacterized protein At5g41620-like [Glycine max]		ID=arahy.Tifrunner.gnm1.ann1.WSU996;Name=arahy.WSU996;Dbxref=Coils:Coil,PANTHER:PTHR31071,PANTHER:PTHR31071:SF0;Note=uncharacterized protein At5g41620-like [Glycine max]
around significant QTL	2008	Na	AX-147238042	11	12432001	12448987	12456435	Name=arahy.F03U7D	ataxin-2 homolog isoform X2 [Glycine max]		ID=arahy.Tifrunner.gnm1.ann1.F03U7D;Name=arahy.F03U7D;Dbxref=Gene3D:G3DSA:2.30.30.100,InterPro:IPR025852,PANTHER:PTHR12854,PANTHER:PTHR12854:SF10,Pfam:PF14438;Note=ataxin-2 homolog isoform X2 [Glycine max]%3B IPR025852 (Ataxin 2%2C SM domain)
around significant QTL	2008	Na	AX-147238042	11	12432001	12462399	12468494	Name=arahy.HCD3KF	ribosome maturation protein SBDS-like [Glycine max]	metal ion binding	ID=arahy.Tifrunner.gnm1.ann1.HCD3KF;Name=arahy.HCD3KF;Dbxref=Gene3D:G3DSA:3.30.1250.10,InterPro:IPR002140,InterPro:IPR007087,InterPro:IPR018023,InterPro:IPR018978,InterPro:IPR019783,JCVI_TIGRFAMS:TIGR00291,PANTHER:PTHR10927,Pfam:PF01172,Pfam:PF09377,Prosite:PS00028,Prosite:PS01267,Prosite:PS50157,Superfamily:SSF109728,Superfamily:SSF57667,Superfamily:SSF89895;Ontology_term=GO:0042254,GO:0046872;N…
around significant QTL	2008	Na	AX-147238042	11	12432001	12484099	12489570	Name=arahy.IXNR8T	purple acid phosphatase 18	metal ion binding	ID=arahy.Tifrunner.gnm1.ann1.IXNR8T;Name=arahy.IXNR8T;Dbxref=Gene3D:G3DSA:2.60.40.380,Gene3D:G3DSA:3.60.21.10,InterPro:IPR004843,InterPro:IPR008963,InterPro:IPR015914,InterPro:IPR025733,PANTHER:PTHR22953,PANTHER:PTHR22953:SF0,Pfam:PF00149,Pfam:PF14008,Superfamily:SSF49363,Superfamily:SSF56300;Ontology_term=GO:0003993,GO:0016787,GO:0046872;Note=purple acid phosphatase 18%3B IPR004843 (Phosphoester…
around significant QTL	2008	Na	AX-147221598	5	6323091	6221279	6223456	Name=arahy.4H7469	xyloglucan endotransglucosylase/hydrolase 6		ID=arahy.Tifrunner.gnm1.ann1.4H7469;Name=arahy.4H7469;Dbxref=Gene3D:G3DSA:2.60.120.200,InterPro:IPR000757,InterPro:IPR008263,InterPro:IPR008985,InterPro:IPR010713,InterPro:IPR013320,InterPro:IPR016455,PANTHER:PTHR31062,PANTHER:PTHR31062:SF0,PIR:PIRSF005604,Pfam:PF00722,Pfam:PF06955,Prosite:PS01034,Superfamily:SSF49899;Ontology_term=GO:0004553,GO:0005618,GO:0005975,GO:0006073,GO:0016762,GO:0048046…
around significant QTL	2008	Na	AX-147221598	5	6323091	6224945	6225166	Name=arahy.H4NWU4	Clavata3/ESR (CLE) gene family member MtCLE04		ID=arahy.Tifrunner.gnm1.ann1.H4NWU4;Name=arahy.H4NWU4;Note=Clavata3/ESR (CLE) gene family member MtCLE04
around significant QTL	2008	Na	AX-147221598	5	6323091	6281717	6283631	Name=arahy.JT7MF5	MYB transcription factor MYB92 [Glycine max]	DNA binding	ID=arahy.Tifrunner.gnm1.ann1.JT7MF5;Name=arahy.JT7MF5;Dbxref=Gene3D:G3DSA:1.10.10.60,InterPro:IPR001005,InterPro:IPR009057,InterPro:IPR017930,PANTHER:PTHR10641,PANTHER:PTHR10641:SF30,Pfam:PF00249,Prosite:PS51294,SMART:SM00717,Superfamily:SSF46689;Ontology_term=GO:0003677,GO:0003682;Note=MYB transcription factor MYB92 [Glycine max]%3B IPR009057 (Homeodomain-like)%3B GO:0003677 (DNA binding)%2C GO:…
around significant QTL	2008	Na	AX-147221598	5	6323091	6312389	6314301	Name=arahy.CDLA1L	MYB transcription factor MYB92 [Glycine max]	DNA binding	ID=arahy.Tifrunner.gnm1.ann1.CDLA1L;Name=arahy.CDLA1L;Dbxref=Gene3D:G3DSA:1.10.10.60,InterPro:IPR001005,InterPro:IPR009057,InterPro:IPR017930,PANTHER:PTHR10641,PANTHER:PTHR10641:SF30,Pfam:PF00249,Prosite:PS51294,SMART:SM00717,Superfamily:SSF46689;Ontology_term=GO:0003677,GO:0003682;Note=MYB transcription factor MYB92 [Glycine max]%3B IPR009057 (Homeodomain-like)%3B GO:0003677 (DNA binding)%2C GO:…
around significant QTL	2008	Na	AX-147221598	5	6323091	6525396	6526196	Name=arahy.IMCF17	ribose-5-phosphate isomerase 2		ID=arahy.Tifrunner.gnm1.ann1.IMCF17;Name=arahy.IMCF17;Dbxref=Gene3D:G3DSA:3.30.70.260,Gene3D:G3DSA:3.40.50.1360,HAMAP:MF_00170,InterPro:IPR004788,InterPro:IPR020672,JCVI_TIGRFAMS:TIGR00021,PANTHER:PTHR11934,PANTHER:PTHR11934:SF6,Pfam:PF06026,Superfamily:SSF100950,Superfamily:SSF75445;Ontology_term=GO:0004751,GO:0009052;Note=ribose-5-phosphate isomerase 2%3B IPR004788 (Ribose 5-phosphate isomerase…
around significant QTL	2008	Na	AX-147221598	5	6323091	6599447	6600949	Name=arahy.T0P5W2	scarecrow-like transcription factor PAT1-like [Glycine max]		ID=arahy.Tifrunner.gnm1.ann1.T0P5W2;Name=arahy.T0P5W2;Dbxref=InterPro:IPR005202,PANTHER:PTHR31636,Pfam:PF03514,Prosite:PS50985;Note=scarecrow-like transcription factor PAT1-like [Glycine max]%3B IPR005202 (Transcription factor GRAS)
around significant QTL	2008	Na	AX-147219784	4	27963468	28171933	28174089	Name=arahy.GKQN4T	coiled-coil domain-containing protein 97-like [Glycine max]		ID=arahy.Tifrunner.gnm1.ann1.GKQN4T;Name=arahy.GKQN4T;Dbxref=Coils:Coil,InterPro:IPR018613,PANTHER:PTHR31840,PANTHER:PTHR31840:SF1,Pfam:PF09747;Note=coiled-coil domain-containing protein 97-like [Glycine max]%3B IPR018613 (Protein of unknown function DUF2052%2C coiled-coil)
around significant QTL	2008	Na	AX-147246850	14	5481262	5396525	5397007	Name=arahy.PDVV0K	RING zinc finger protein		ID=arahy.Tifrunner.gnm1.ann1.PDVV0K;Name=arahy.PDVV0K;Note=RING zinc finger protein%2C putative
around significant QTL	2008	Na	AX-147246850	14	5481262	5500196	5503799	Name=arahy.S89UIY	receptor-like protein kinase 4	ATP binding	ID=arahy.Tifrunner.gnm1.ann1.S89UIY;Name=arahy.S89UIY;Dbxref=Gene3D:G3DSA:1.10.510.10,Gene3D:G3DSA:2.60.120.200,Gene3D:G3DSA:3.30.200.20,InterPro:IPR000719,InterPro:IPR001245,InterPro:IPR011009,InterPro:IPR013320,InterPro:IPR017441,PANTHER:PTHR24420,Pfam:PF07714,Prosite:PS00107,Prosite:PS50011,Superfamily:SSF56112;Ontology_term=GO:0004672,GO:0005524,GO:0006468,GO:0016772;Note=receptor-like protei…
around significant QTL	2008	Na	AX-147246850	14	5481262	5639164	5640441	Name=arahy.8KRZ7W	Eukaryotic aspartyl protease family protein		ID=arahy.Tifrunner.gnm1.ann1.8KRZ7W;Name=arahy.8KRZ7W;Dbxref=Gene3D:G3DSA:2.40.70.10,InterPro:IPR001461,InterPro:IPR021109,PANTHER:PTHR13683,PANTHER:PTHR13683:SF100,Pfam:PF14541,Pfam:PF14543,Superfamily:SSF50630;Ontology_term=GO:0004190,GO:0006508;Note=Eukaryotic aspartyl protease family protein%3B IPR001461 (Aspartic peptidase)%2C IPR021109 (Aspartic peptidase domain)%3B GO:0004190 (aspartic-typ…
around significant QTL	2008	Na	AX-147246850	14	5481262	5663422	5664687	Name=arahy.TB2MDL	basic 7S globulin-like [Glycine max]		ID=arahy.Tifrunner.gnm1.ann1.TB2MDL;Name=arahy.TB2MDL;Dbxref=Gene3D:G3DSA:2.40.70.10,InterPro:IPR001461,InterPro:IPR021109,PANTHER:PTHR13683,PANTHER:PTHR13683:SF100,Pfam:PF14541,Pfam:PF14543,Superfamily:SSF50630;Ontology_term=GO:0004190,GO:0006508;Note=basic 7S globulin-like [Glycine max]%3B IPR001461 (Aspartic peptidase)%2C IPR021109 (Aspartic peptidase domain)%3B GO:0004190 (aspartic-type endop…
around significant QTL	2008	Na	AX-147246850	14	5481262	5704771	5713654	Name=arahy.8AL6VH	receptor-like protein kinase 1	ATP binding	ID=arahy.Tifrunner.gnm1.ann1.8AL6VH;Name=arahy.8AL6VH;Dbxref=Gene3D:G3DSA:1.10.510.10,Gene3D:G3DSA:2.60.120.200,Gene3D:G3DSA:2.90.10.10,Gene3D:G3DSA:3.30.200.20,InterPro:IPR000719,InterPro:IPR001480,InterPro:IPR002290,InterPro:IPR008271,InterPro:IPR011009,InterPro:IPR013320,InterPro:IPR017441,PANTHER:PTHR24420,Pfam:PF00069,Pfam:PF01453,Prosite:PS00107,Prosite:PS00108,Prosite:PS50011,Prosite:PS509…
around significant QTL	2008	Na	AX-147254196	16	135069925	134785615	134787836	Name=arahy.G7F7H8	Adenylate kinase family protein	ATP binding	ID=arahy.Tifrunner.gnm1.ann1.G7F7H8;Name=arahy.G7F7H8;Dbxref=Gene3D:G3DSA:3.40.50.300,InterPro:IPR000850,InterPro:IPR027417,PANTHER:PTHR23359,PRINTS:PR00094,Pfam:PF00406,Prosite:PS00113,Superfamily:SSF52540;Ontology_term=GO:0005524,GO:0006139,GO:0019205;Note=Adenylate kinase family protein%3B IPR000850 (Adenylate kinase/UMP-CMP kinase)%2C IPR027417 (P-loop containing nucleoside triphosphate hydro…
around significant QTL	2008	Na	AX-147254196	16	135069925	135066630	135076190	Name=arahy.M0JNNK	protein TPLATE-like [Glycine max]	membrane transport	ID=arahy.Tifrunner.gnm1.ann1.M0JNNK;Name=arahy.M0JNNK;Dbxref=InterPro:IPR016024,Superfamily:SSF48371;Ontology_term=GO:0005488;Note=protein TPLATE-like [Glycine max]%3B IPR016024 (Armadillo-type fold)%3B GO:0005488 (binding)
around significant QTL	2008	Na	AX-147254196	16	135069925	135090924	135095204	Name=arahy.ZUT0YB	glutamate receptor 2.5	membrane transport	ID=arahy.Tifrunner.gnm1.ann1.ZUT0YB;Name=arahy.ZUT0YB;Dbxref=Gene3D:G3DSA:1.10.287.70,Gene3D:G3DSA:3.40.190.10,Gene3D:G3DSA:3.40.50.2300,InterPro:IPR001320,InterPro:IPR001638,InterPro:IPR001828,InterPro:IPR028082,PANTHER:PTHR18966,PANTHER:PTHR18966:SF7,Pfam:PF00060,Pfam:PF00497,Pfam:PF01094,SMART:SM00079,Superfamily:SSF53822,Superfamily:SSF53850;Ontology_term=GO:0004970,GO:0005215,GO:0005234,GO:0…
around significant QTL	2008	Na	AX-147254196	16	135069925	135099117	135104227	Name=arahy.L0LQMM	Galactose oxidase/kelch repeat superfamily protein	protein binding	ID=arahy.Tifrunner.gnm1.ann1.L0LQMM;Name=arahy.L0LQMM;Dbxref=Gene3D:G3DSA:2.120.10.80,InterPro:IPR015915,PANTHER:PTHR24413,PANTHER:PTHR24413:SF38,Pfam:PF13964,Superfamily:SSF117281;Ontology_term=GO:0005515;Note=Galactose oxidase/kelch repeat superfamily protein%3B IPR015915 (Kelch-type beta propeller)%3B GO:0005515 (protein binding)
around significant QTL	2008	Na	AX-147254196	16	135069925	135203442	135208978	Name=arahy.Y4R2VT	Transmembrane amino acid transporter family protein	transmembrane	ID=arahy.Tifrunner.gnm1.ann1.Y4R2VT;Name=arahy.Y4R2VT;Dbxref=InterPro:IPR013057,PANTHER:PTHR22950,PANTHER:PTHR22950:SF47,Pfam:PF01490;Note=Transmembrane amino acid transporter family protein%3B IPR013057 (Amino acid transporter%2C transmembrane)
around significant QTL	2009	S	AX-177641822	20	46517062	46662056	46662411	Name=arahy.N76Q1G	ATP synthase subunit alpha n		ID=arahy.Tifrunner.gnm1.ann1.N76Q1G;Name=arahy.N76Q1G;Note=ATP synthase subunit alpha n%3D2 Tax%3Dfabids RepID%3DG7I9Q9_MEDTR
around significant QTL	2009	S	AX-177642430	20	85526706	85102817	85110576	Name=arahy.SQ507X	nodulin MtN21 /EamA-like transporter family protein	transmembrane transporter activity	ID=arahy.Tifrunner.gnm1.ann1.SQ507X;Name=arahy.SQ507X;Dbxref=InterPro:IPR000620,PANTHER:PTHR31218,PANTHER:PTHR31218:SF0,Pfam:PF00892,Superfamily:SSF103481;Ontology_term=GO:0016020;Note=nodulin MtN21 /EamA-like transporter family protein%3B IPR000620 (Drug/metabolite transporter)%3B GO:0016020 (membrane)
around significant QTL	2009	S	AX-177641822	20	46517062	46219684	46224033	Name=arahy.1J5WG7	CTV.20 n	heme binding, iron ion binding	ID=arahy.Tifrunner.gnm1.ann1.1J5WG7;Name=arahy.1J5WG7;Dbxref=Coils:Coil,Gene3D:G3DSA:4.10.60.10,InterPro:IPR001878,PANTHER:PTHR10178,Pfam:PF00098,Prosite:PS50158,SMART:SM00343,Superfamily:SSF57756;Ontology_term=GO:0003676,GO:0008270;Note=CTV.20 n%3D1 Tax%3DPoncirus trifoliata RepID%3DQ8H6Q8_PONTR%3B IPR001878 (Zinc finger%2C CCHC-type)%3B GO:0003676 (nucleic acid binding)%2C GO:0008270 (zinc ion …
around significant QTL	2009	Zn	AX-176818003	15	22450498	22443276	22449787	Name=arahy.N7ITH3	ABC transporter family protein	transmembrane transport	ID=arahy.Tifrunner.gnm1.ann1.N7ITH3;Name=arahy.N7ITH3;Dbxref=Gene3D:G3DSA:1.20.1560.10,InterPro:IPR001140,InterPro:IPR011527,PANTHER:PTHR24222,PANTHER:PTHR24222:SF4,Pfam:PF00664,Prosite:PS50929,Superfamily:SSF90123;Ontology_term=GO:0005524,GO:0006810,GO:0016021,GO:0042626,GO:0055085;Note=ABC transporter family protein%3B IPR011527 (ABC transporter type 1%2C transmembrane domain)%3B GO:0005524 (AT…
around significant QTL	2009	Zn	AX-176818003	15	22450498	22485600	22492871	Name=arahy.M8SMER	MATE efflux family protein	transmembrane transport	ID=arahy.Tifrunner.gnm1.ann1.M8SMER;Name=arahy.M8SMER;Dbxref=InterPro:IPR002528,JCVI_TIGRFAMS:TIGR00797,PANTHER:PTHR11206,PANTHER:PTHR11206:SF21,Pfam:PF01554;Ontology_term=GO:0006855,GO:0015238,GO:0015297,GO:0016020,GO:0055085;Note=MATE efflux family protein%3B IPR002528 (Multi antimicrobial extrusion protein)%3B GO:0006855 (drug transmembrane transport)%2C GO:0015238 (drug transmembrane transpor…
around significant QTL	2009	Zn	AX-176818003	15	22450498	22547831	22552420	Name=arahy.UAS7KI	MATE efflux family protein	transmembrane transport	ID=arahy.Tifrunner.gnm1.ann1.UAS7KI;Name=arahy.UAS7KI;Dbxref=InterPro:IPR002528,PANTHER:PTHR11206,PANTHER:PTHR11206:SF21,Pfam:PF01554;Ontology_term=GO:0006855,GO:0015238,GO:0015297,GO:0016020,GO:0055085;Note=MATE efflux family protein%3B IPR002528 (Multi antimicrobial extrusion protein)%3B GO:0006855 (drug transmembrane transport)%2C GO:0015238 (drug transmembrane transporter activity)%2C GO:0015…
around significant QTL	2009	Zn	AX-176818003	15	22450498	22561390	22564676	Name=arahy.Y4EIR3	MATE efflux family protein	transmembrane transport	ID=arahy.Tifrunner.gnm1.ann1.Y4EIR3;Name=arahy.Y4EIR3;Dbxref=PANTHER:PTHR11206,PANTHER:PTHR11206:SF21;Note=MATE efflux family protein

## Sheet: Data Set 2
Data Set 2. Potential candidate genes around suggestive QTLs associated with 13 elemental accumulation.
Region	Year	GWAS trait	SNP_ID	Chr	Pos	Gene start	Gene end	Gene name or putative function	Annotation
around suggest QTL	2008	Ca	AX-176812096	15	12862178	12406030	12409363	Name=arahy.MG688V	Cytochrome P450 superfamily protein
around suggest QTL	2008	Ca	AX-176812096	15	12862178	12432729	12438681	Name=arahy.K7AB56	transmembrane and coiled-coil domain-containing protein 4-like [Glycine max]
around suggest QTL	2008	Ca	AX-176812096	15	12862178	12479657	12484710	Name=arahy.MF3J08	zinc finger CCCH domain protein
around suggest QTL	2008	Ca	AX-176812096	15	12862178	12511253	12518382	Name=arahy.HQ3BES	zinc ion binding
around suggest QTL	2008	Ca	AX-176812096	15	12862178	12581201	12583784	Name=arahy.V574CD	B-box zinc finger protein 20-like [Glycine max]
around suggest QTL	2008	Ca	AX-176812096	15	12862178	12823665	12829580	Name=arahy.9DZU8H	zinc finger CCCH domain-containing protein 45-like [Glycine max]
around suggest QTL	2008	Ca	AX-176812096	15	12862178	13125715	13130653	Name=arahy.J1PMCL	RING-H2 finger protein 2B
around suggest QTL	2008	Ca	AX-176812096	15	12862178	13178017	13201187	Name=arahy.JX1GXL	Cytochrome P450 superfamily protein
around suggest QTL	2008	Ca	AX-176812096	15	12862178	13213769	13216503	Name=arahy.08MLA9	Cytochrome P450 superfamily protein
around suggest QTL	2008	Ca	AX-176812096	15	12862178	13342476	13344473	Name=arahy.H1FI0I	sugar porter (SP) family MFS transporter
around suggest QTL	2008	Ca	AX-176817359	15	13899347	13574876	13580606	Name=arahy.GAK0W0	phospholipase D P2
around suggest QTL	2009	Ca	AX-147244415	13	34773499	34273250	34277925	Name=arahy.ZHT6Z8	mitochondrial processing peptidase alpha subunit
around suggest QTL	2009	Ca	AX-147244415	13	34773499	34585854	34590175	Name=arahy.RDS1N3	protein FAR1-RELATED SEQUENCE 3-like isoform X1 [Glycine max]
around suggest QTL	2009	Ca	AX-147244415	13	34773499	35181740	35183934	Name=arahy.8992SQ	RING finger protein 126-A-like [Glycine max]
around suggest QTL	2009	Ca	AX-176805505	13	108820416	108361004	108363118	Name=arahy.KFDF05	sugar transporter 1
around suggest QTL	2009	Ca	AX-176805505	13	108820416	108628248	108630913	Name=arahy.R1DXQN	Heavy metal transport/detoxification superfamily protein
around suggest QTL	2009	Ca	AX-176805573	13	108848601	108361004	108363118	Name=arahy.KFDF05	sugar transporter 1
around suggest QTL	2008	Fe	AX-176810351	12	2650206	2194121	2195536	Name=arahy.XYCH8I	EF hand calcium-binding protein family
around suggest QTL	2008	Fe	AX-176810351	12	2650206	2981499	2983988	Name=arahy.EZ7NE2	Heavy metal transport/detoxification superfamily protein
around suggest QTL	2008	Fe	AX-176810351	12	2650206	3015638	3019690	Name=arahy.PSKN5N	RING zinc finger protein
around suggest QTL	2008	Fe	AX-176810351	12	2650206	3134378	3134983	Name=arahy.3CXU30	RING-H2 finger protein 2B
around suggest QTL	2008	Fe	AX-176797755	13	132550033	132618007	132618977	Name=arahy.UJ6GL8	Heavy metal transport/detoxification superfamily protein
around suggest QTL	2009	Fe	AX-176803078	4	110119808	110494424	110496505	Name=arahy.XZS3QI	ATP-dependent zinc metalloprotease FTSH protein
around suggest QTL	2009	Fe	AX-176803078	4	110119808	110596723	110601393	Name=arahy.VH0VRX	ZIP metal ion transporter family
around suggest QTL	2009	Fe	AX-147220701	4	110124936	110060594	110069039	Name=arahy.CUVI3A	phospholipid-transporting ATPase 1-like isoform X3 [Glycine max]
around suggest QTL	2009	Fe	AX-176792050	14	118653035	118392260	118397102	Name=arahy.DMHI6U	Inner membrane protein yieG n
around suggest QTL	2009	Cu	AX-147249681	15	25238686	24961735	24966017	Name=arahy.JHN2SG	E3 ubiquitin-protein ligase BOI-like isoform X2 [Glycine max]
around suggest QTL	2008	K	AX-147235101	10	3567092	3299482	3302637	Name=arahy.Y77N6F	cation/H+ exchanger 18
around suggest QTL	2008	K	AX-147235101	10	3567092	3315993	3318723	Name=arahy.FY8LHX	nitric oxide synthase-interacting protein-like [Glycine max]
around suggest QTL	2008	K	AX-147235101	10	3567092	3345348	3345692	Name=arahy.RSW943	Calcium-binding EF-hand family protein
around suggest QTL	2008	K	AX-147235101	10	3567092	3722527	3723207	Name=arahy.C5S9N3	RING zinc finger protein
around suggest QTL	2008	K	AX-147235101	10	3567092	3734811	3735825	Name=arahy.93SQK7	C6HC-type zinc finger RING/U-box protein
around suggest QTL	2008	K	AX-147235101	10	3567092	3930634	3932782	Name=arahy.VI2FPQ	Sulfite exporter TauE/SafE family protein
around suggest QTL	2008	K	AX-177638509	18	124240452	123754709	123759566	Name=arahy.87P4VZ	sulfate transporter 1
around suggest QTL	2008	K	AX-177638509	18	124240452	123781089	123784282	Name=arahy.5B1E4M	MATE efflux family protein
around suggest QTL	2008	K	AX-177638509	18	124240452	123934976	123938314	Name=arahy.CCZM0J	annexin 8
around suggest QTL	2008	K	AX-177638509	18	124240452	124072423	124074482	Name=arahy.N5M7A0	annexin 3
around suggest QTL	2008	K	AX-177638509	18	124240452	124082983	124090005	Name=arahy.39EPPD	annexin 4
around suggest QTL	2008	K	AX-177638509	18	124240452	124140338	124145598	Name=arahy.KK07FU	annexin 3
around suggest QTL	2009	K	AX-177637481	20	130323667	130200785	130206222	Name=arahy.8F7PE4	Cytochrome P450 superfamily protein
around suggest QTL	2009	K	AX-177637481	20	130323667	130326698	130332969	Name=arahy.54B16H	Anion exchange family protein n
around suggest QTL	2009	K	AX-177637481	20	130323667	130420660	130422725	Name=arahy.B6Q9P5	iron-sulfur cluster assembly protein IscU
around suggest QTL	2009	K	AX-177637481	20	130323667	130423445	130425246	Name=arahy.R3RRFQ	inositol-tetrakisphosphate 1-kinase 1-like isoform X1 [Glycine max]
around suggest QTL	2009	K	AX-177637481	20	130323667	130649046	130651086	Name=arahy.9D5CB6	dof zinc finger protein DOF5.6 [Glycine max]
around suggest QTL	2009	K	AX-147221637	5	7049419	6669509	6675705	Name=arahy.DXU8TV	transmembrane protein 194A-like [Glycine max]
around suggest QTL	2009	K	AX-147221637	5	7049419	6916606	6924678	Name=arahy.DH8F8S	calcium-transporting ATPase 2
around suggest QTL	2009	K	AX-147221637	5	7049419	6924768	6929530	Name=arahy.JGWU85	calcium-transporting ATPase 2
around suggest QTL	2009	K	AX-147221637	5	7049419	6964349	6968714	Name=arahy.JA05KE	BTB and TAZ domain protein 4
around suggest QTL	2009	K	AX-147221637	5	7049419	7323157	7329255	Name=arahy.ZFAB9L	Iron ion binding / oxidoreductase/ oxidoreductase protein n
around suggest QTL	2009	K	AX-147221637	5	7049419	7478133	7481436	Name=arahy.VHC3ET	NRAMP metal ion transporter 2
around suggest QTL	2008	Mg	AX-177643041	18	22850849	22524283	22526911	Name=arahy.4A70PZ	purple acid phosphatase 10
around suggest QTL	2008	Mg	AX-177643041	18	22850849	22542294	22547119	Name=arahy.N79JF7	purple acid phosphatase 10
around suggest QTL	2008	Mg	AX-177643041	18	22850849	23079101	23083989	Name=arahy.C4I3TP	ATP-binding ABC transporter
around suggest QTL	2008	Mg	AX-177639117	20	120152356	120563562	120571041	Name=arahy.EKA7CT	Cytochrome P450 superfamily protein
around suggest QTL	2008	Mg	AX-177639117	20	120152356	120639118	120641943	Name=arahy.PJ98Y2	Cytochrome P450 superfamily protein
around suggest QTL	2008	Mg	AX-177642668	18	124438815	124072423	124074482	Name=arahy.N5M7A0	annexin 3
around suggest QTL	2008	Mg	AX-177642668	18	124438815	124082983	124090005	Name=arahy.39EPPD	annexin 4
around suggest QTL	2008	Mg	AX-177642668	18	124438815	124140338	124145598	Name=arahy.KK07FU	annexin 3
around suggest QTL	2008	Mg	AX-177642668	18	124438815	124909258	124925706	Name=arahy.PWI1R1	MATE efflux family protein
around suggest QTL	2008	Mg	AX-177642668	18	124438815	124927275	124933096	Name=arahy.45U3L8	MATE efflux family protein
around suggest QTL	2009	Mg	AX-176816911	13	57563662	57644555	57646437	Name=arahy.RSIS5G	Zinc knuckle family protein n
around suggest QTL	2009	Mg	AX-176816911	13	57563662	57659962	57662422	Name=arahy.DQ3ZQE	CTV.20 n
around suggest QTL	2009	Mg	AX-176817768	16	127649754	127679068	127680570	Name=arahy.XV7MNQ	Heavy metal transport/detoxification superfamily protein
around suggest QTL	2009	Mg	AX-176817768	16	127649754	128000494	128003841	Name=arahy.0M9QLC	Cytochrome P450 superfamily protein
around suggest QTL	2008	Mn	AX-147253770	16	128651353	128161380	128166451	Name=arahy.3E1BT5	magnesium transporter NIPA3 isoform X2 [Glycine max]
around suggest QTL	2008	Mn	AX-147253770	16	128651353	128499663	128504974	Name=arahy.SEW56W	Potassium transporter family protein
around suggest QTL	2008	Mn	AX-147253770	16	128651353	128899829	128904212	Name=arahy.Q30J3K	calcium-binding mitochondrial carrier protein SCaMC-1-like [Glycine max]
around suggest QTL	2008	Mn	AX-177639717	20	18256661	18029515	18036645	Name=arahy.KS9FMV	ATP-dependent RNA helicase
around suggest QTL	2008	Mn	AX-177639717	20	18256661	18661555	18663325	Name=arahy.F32E1L	ABC transporter family protein
around suggest QTL	2008	Mn	AX-176819328	9	3822537	3467447	3476996	Name=arahy.XPR4K7	ATP-binding ABC transporter
around suggest QTL	2008	Mn	AX-176819328	9	3822537	3491553	3493730	Name=arahy.FP3ASR	MYB transcription factor MYB62 [Glycine max]
around suggest QTL	2008	Mn	AX-176819328	9	3822537	3748180	3751687	Name=arahy.0VT33L	calcium-dependent protein kinase 20
around suggest QTL	2008	Mn	AX-176819328	9	3822537	3855427	3862656	Name=arahy.XMGK4K	transmembrane receptors
around suggest QTL	2008	Mo	AX-177639328	20	18077773	17735574	17738543	Name=arahy.5WW9LS	E3 ubiquitin-protein ligase [Glycine max]
around suggest QTL	2008	Mo	AX-177637782	20	17570332	17178539	17184734	Name=arahy.9HYI17	E3 ubiquitin-protein ligase RGLG2-like isoform X1 [Glycine max]
around suggest QTL	2008	Mo	AX-177637782	20	17570332	18029515	18036645	Name=arahy.KS9FMV	ATP-dependent RNA helicase
around suggest QTL	2008	Mo	AX-177639567	20	110673150	110734137	110737041	Name=arahy.DGN58K	beta-glucosidase 11 [Glycine max]
around suggest QTL	2008	Mo	AX-177639567	20	110673150	110826636	110828620	Name=arahy.JX32JF	sugar transporter ERD6-like 16-like [Glycine max]
around suggest QTL	2009	Mo	AX-176811191	3	10098390	9602844	9609453	Name=arahy.F4JI80	calcium-transporting ATPase 4
around suggest QTL	2009	Mo	AX-176811191	3	10098390	9613144	9619498	Name=arahy.W4JVCT	RNA-binding domain CCCH-type zinc finger protein
around suggest QTL	2009	Mo	AX-176811191	3	10098390	10299977	10303246	Name=arahy.0UNN3I	cation/H+ exchanger 19
around suggest QTL	2009	Mo	AX-176811191	3	10098390	10324164	10331261	Name=arahy.L35I2V	PHD finger family protein
around suggest QTL	2009	Mo	AX-176811191	3	10098390	10423158	10427046	Name=arahy.HA8IQE	purple acid phosphatase 10
around suggest QTL	2009	Mo	AX-176811191	3	10098390	10451481	10455660	Name=arahy.DAPS6C	purple acid phosphatase 10
around suggest QTL	2009	Mo	AX-176811191	3	10098390	10511257	10514934	Name=arahy.L8AQGG	purple acid phosphatase 10
around suggest QTL	2009	Mo	AX-176797751	3	9849650	9498890	9508818	Name=arahy.ZE4J6B	purple acid phosphatase 27
around suggest QTL	2009	Mo	AX-176797751	3	9849650	10349275	10356886	Name=arahy.U9UY67	histone-lysine N-methyltransferase 2D-like isoform X4 [Glycine max]
around suggest QTL	2009	Mo	AX-177644362	18	117846997	117844779	117857610	Name=arahy.ZP601Q	zinc finger CCCH domain-containing protein 37-like [Glycine max]
around suggest QTL	2009	Mo	AX-177644362	18	117846997	118074956	118082332	Name=arahy.UXU7CF	phospholipid-transporting ATPase 1-like isoform X1 [Glycine max]
around suggest QTL	2009	Mo	AX-177644362	18	117846997	118204509	118206017	Name=arahy.SNX30H	E2F transcription factor 1
around suggest QTL	2009	Mo	AX-177644362	18	117846997	118218987	118226767	Name=arahy.MWA09F	serrate RNA effector molecule-like protein
around suggest QTL	2008	Ni	AX-176814835	3	120779244	120685347	120689333	Name=arahy.7L4V6Q	protein FAR1-RELATED SEQUENCE 5-like [Glycine max]
around suggest QTL	2008	Ni	AX-176818776	13	115500602	115092995	115095439	Name=arahy.VFJ7H8	GATA type zinc finger transcription factor family protein
around suggest QTL	2009	Ni	AX-176803685	4	61282261	60899978	60902406	Name=arahy.MH5L6C	Zinc knuckle family protein n
around suggest QTL	2009	Ni	AX-176803685	4	61282261	60906067	60908029	Name=arahy.PC7CW8	Zinc knuckle family protein n
around suggest QTL	2009	Ni	AX-176804895	14	110469639	109959942	109974085	Name=arahy.R1VLIZ	RING finger and CHY zinc finger protein
around suggest QTL	2009	Ni	AX-176804895	14	110469639	110309861	110313733	Name=arahy.VWE764	pyruvate decarboxylase-2
around suggest QTL	2009	Ni	AX-176804895	14	110469639	110366137	110368905	Name=arahy.XIC2ZC	cyclic nucleotide-gated ion channel-like protein
around suggest QTL	2009	Na	AX-176823723	20	135196866	135006372	135013624	Name=arahy.S2YQMD	purple acid phosphatase 23
around suggest QTL	2009	Na	AX-176823723	20	135196866	135114503	135118147	Name=arahy.I6LI5E	blue copper protein-like [Glycine max]
around suggest QTL	2009	Na	AX-176823723	20	135196866	135665853	135684986	Name=arahy.HNPA74	DNA binding
around suggest QTL	2008	P	AX-147227576	7	7873761	8279561	8280118	Name=arahy.VN1U1F	RING-H2 finger protein 2B
around suggest QTL	2008	P	AX-147227515	7	6843425	6346726	6354704	Name=arahy.NA6SJF	E3 ubiquitin-protein ligase COP1-like [Glycine max]
around suggest QTL	2008	P	AX-147227515	7	6843425	6398760	6403036	Name=arahy.Q92UBX	zinc finger CCCH domain protein
around suggest QTL	2008	P	AX-147227515	7	6843425	6424904	6429177	Name=arahy.068H8T	zinc finger CCCH domain protein
around suggest QTL	2008	P	AX-147227515	7	6843425	6682516	6683831	Name=arahy.FE2NQF	Heavy metal transport/detoxification superfamily protein
around suggest QTL	2008	P	AX-147227515	7	6843425	6698656	6699102	Name=arahy.XIVB9A	Calcium-binding EF-hand family protein
around suggest QTL	2008	P	AX-147227515	7	6843425	6709130	6709573	Name=arahy.029YZL	Calcium-binding EF-hand family protein
around suggest QTL	2008	P	AX-147227515	7	6843425	6714800	6717220	Name=arahy.A3V5PU	Calcium-binding EF-hand family protein
around suggest QTL	2008	P	AX-147227515	7	6843425	6723461	6728294	Name=arahy.KYR3DH	terpene synthase 03
around suggest QTL	2008	P	AX-147227515	7	6843425	7229156	7229668	Name=arahy.X4SEKR	plastocyanin 1
around suggest QTL	2008	P	AX-176803147	7	7601652	7710520	7711691	Name=arahy.WNP8KX	copper transport protein CCH [Glycine max]
around suggest QTL	2008	P	AX-176803147	7	7601652	7865757	7868717	Name=arahy.74XWUR	protein FAR1-RELATED SEQUENCE 5-like [Glycine max]
around suggest QTL	2008	P	AX-176803147	7	7601652	8045080	8051107	Name=arahy.L5QT4E	ferritin 4
around suggest QTL	2009	P	AX-176813035	11	55522887	55592350	55593206	Name=arahy.5M8WSB	blue copper protein-like [Glycine max]
around suggest QTL	2009	P	AX-176813035	11	55522887	55932163	55937458	Name=arahy.1K1ZSN	Cu/Zn-superoxide dismutase copper chaperone
around suggest QTL	2009	P	AX-176807230	11	134886639	134445827	134449611	Name=arahy.D6V4QV	cation/H+ exchanger 19
around suggest QTL	2009	P	AX-176807230	11	134886639	134450079	134452692	Name=arahy.I1NZHN	Transmembrane proteins 14C
around suggest QTL	2009	P	AX-176807230	11	134886639	135020332	135025099	Name=arahy.KMR140	PHD finger protein ALFIN-LIKE 2-like [Glycine max]
around suggest QTL	2009	P	AX-176807230	11	134886639	135251728	135258311	Name=arahy.LC1B8P	sodium hydrogen exchanger 5
around suggest QTL	2009	P	AX-176807230	11	134886639	135346384	135354372	Name=arahy.KTHI2W	calcineurin B-like 3
around suggest QTL	2008	S	AX-147214857	2	86249251	85779664	85785848	Name=arahy.5G098T	transmembrane protein
around suggest QTL	2008	S	AX-147214857	2	86249251	86346408	86351514	Name=arahy.D72KY4	RING/FYVE/PHD zinc finger superfamily protein
around suggest QTL	2008	S	AX-176820029	4	20050505	19970597	19971402	Name=arahy.4P3687	ABC transporter family protein

## Sheet: Data Set 3
Data Set 3. Potential causal genes obtained by Camoco associated with elemental accumulation.
Trait	gene	score	num_trans_edges	zscore	fdr	num_real	num_random	bs_mean	bs_std	COB	Ontology	Term	WindowSize	FlankLimit	TermLoci	TermCollapsedLoci	TermPValue	NumBootstraps	Method	SNP2Gene
B	50kb 1
B	ARAHY.TIFRUNNER.GNM1.ANN1.0UTR6Y	0.491034	91	1.81978	0.82	1	0.82	0.00170202	0.268895	AraRoot36	PeanutIonome	B	50000	1	24	24	0.56	100	density	effective
B	ARAHY.TIFRUNNER.GNM1.ANN1.KPV5JG	0.235095	91	0.867969	1.675	2	3.35	0.00170202	0.268895	AraRoot36	PeanutIonome	B	50000	1	24	24	0.56	100	density	effective
B	ARAHY.TIFRUNNER.GNM1.ANN1.04D7UL	0.185312	91	0.682831	1.48	3	4.44	0.00170202	0.268895	AraRoot36	PeanutIonome	B	50000	1	24	24	0.56	100	density	effective
B	ARAHY.TIFRUNNER.GNM1.ANN1.T0QXQZ	0.134829	91	0.495087	1.116	5	5.58	0.00170202	0.268895	AraRoot36	PeanutIonome	B	50000	1	24	24	0.56	100	density	effective
B	ARAHY.TIFRUNNER.GNM1.ANN1.Q758V8	0.0807463	91	0.293959	1.116	5	5.58	0.00170202	0.268895	AraRoot36	PeanutIonome	B	50000	1	24	24	0.56	100	density	effective
B	ARAHY.TIFRUNNER.GNM1.ANN1.QB26WD	0.0593592	91	0.214422	1.14833	6	6.89	0.00170202	0.268895	AraRoot36	PeanutIonome	B	50000	1	24	24	0.56	100	density	effective
B	50kb 2
B	ARAHY.TIFRUNNER.GNM1.ANN1.CH6R50	0.441078	190	1.86407	1.085	1	1.085	-0.00224388	0.237825	AraRoot36	PeanutIonome	B	50000	2	24	24	0.265	200	density	effective
B	ARAHY.TIFRUNNER.GNM1.ANN1.0UTR6Y	0.405121	190	1.71288	0.7925	2	1.585	-0.00224388	0.237825	AraRoot36	PeanutIonome	B	50000	2	24	24	0.265	200	density	effective
B	ARAHY.TIFRUNNER.GNM1.ANN1.ZW7540	0.296315	190	1.25537	0.79	3	2.37	-0.00224388	0.237825	AraRoot36	PeanutIonome	B	50000	2	24	24	0.265	200	density	effective
B	ARAHY.TIFRUNNER.GNM1.ANN1.KPV5JG	0.266785	190	1.13121	0.82	4	3.28	-0.00224388	0.237825	AraRoot36	PeanutIonome	B	50000	2	24	24	0.265	200	density	effective
B	ARAHY.TIFRUNNER.GNM1.ANN1.GE9U5Y	0.216262	190	0.918768	0.79	6	4.74	-0.00224388	0.237825	AraRoot36	PeanutIonome	B	50000	2	24	24	0.265	200	density	effective
B	ARAHY.TIFRUNNER.GNM1.ANN1.Q758V8	0.206571	190	0.878017	0.79	6	4.74	-0.00224388	0.237825	AraRoot36	PeanutIonome	B	50000	2	24	24	0.265	200	density	effective
B	ARAHY.TIFRUNNER.GNM1.ANN1.04D7UL	0.170789	190	0.727565	0.780625	8	6.245	-0.00224388	0.237825	AraRoot36	PeanutIonome	B	50000	2	24	24	0.265	200	density	effective
B	ARAHY.TIFRUNNER.GNM1.ANN1.400PFG	0.134014	190	0.572934	0.780625	8	6.245	-0.00224388	0.237825	AraRoot36	PeanutIonome	B	50000	2	24	24	0.265	200	density	effective
B	ARAHY.TIFRUNNER.GNM1.ANN1.T0QXQZ	0.11501	190	0.493027	0.876111	9	7.885	-0.00224388	0.237825	AraRoot36	PeanutIonome	B	50000	2	24	24	0.265	200	density	effective
B	ARAHY.TIFRUNNER.GNM1.ANN1.LD9RN9	0.0437462	190	0.193378	0.829167	12	9.95	-0.00224388	0.237825	AraRoot36	PeanutIonome	B	50000	2	24	24	0.265	200	density	effective
B	ARAHY.TIFRUNNER.GNM1.ANN1.L7CVHL	0.0230522	190	0.106364	0.829167	12	9.95	-0.00224388	0.237825	AraRoot36	PeanutIonome	B	50000	2	24	24	0.265	200	density	effective
B	ARAHY.TIFRUNNER.GNM1.ANN1.N938ZP	0.00500002	190	0.030459	0.829167	12	9.95	-0.00224388	0.237825	AraRoot36	PeanutIonome	B	50000	2	24	24	0.265	200	density	effective
B	50kb 5
B	ARAHY.TIFRUNNER.GNM1.ANN1.CH6R50	0.441078	190	1.73295	0.803333	2	1.60667	0.0123096	0.247422	AraRoot36	PeanutIonome	B	50000	5	24	24	0.353333	150	density	effective
B	ARAHY.TIFRUNNER.GNM1.ANN1.0UTR6Y	0.405121	190	1.58762	0.803333	2	1.60667	0.0123096	0.247422	AraRoot36	PeanutIonome	B	50000	5	24	24	0.353333	150	density	effective
B	ARAHY.TIFRUNNER.GNM1.ANN1.ZW7540	0.296315	190	1.14786	0.856667	4	3.42667	0.0123096	0.247422	AraRoot36	PeanutIonome	B	50000	5	24	24	0.353333	150	density	effective
B	ARAHY.TIFRUNNER.GNM1.ANN1.KPV5JG	0.266785	190	1.02851	0.856667	4	3.42667	0.0123096	0.247422	AraRoot36	PeanutIonome	B	50000	5	24	24	0.353333	150	density	effective
B	ARAHY.TIFRUNNER.GNM1.ANN1.GE9U5Y	0.216262	190	0.824312	0.803333	6	4.82	0.0123096	0.247422	AraRoot36	PeanutIonome	B	50000	5	24	24	0.353333	150	density	effective
B	ARAHY.TIFRUNNER.GNM1.ANN1.Q758V8	0.206571	190	0.785142	0.803333	6	4.82	0.0123096	0.247422	AraRoot36	PeanutIonome	B	50000	5	24	24	0.353333	150	density	effective
B	ARAHY.TIFRUNNER.GNM1.ANN1.04D7UL	0.170789	190	0.640525	0.890476	7	6.23333	0.0123096	0.247422	AraRoot36	PeanutIonome	B	50000	5	24	24	0.353333	150	density	effective
B	ARAHY.TIFRUNNER.GNM1.ANN1.400PFG	0.134014	190	0.491891	0.882222	9	7.94	0.0123096	0.247422	AraRoot36	PeanutIonome	B	50000	5	24	24	0.353333	150	density	effective
B	ARAHY.TIFRUNNER.GNM1.ANN1.T0QXQZ	0.11501	190	0.415084	0.882222	9	7.94	0.0123096	0.247422	AraRoot36	PeanutIonome	B	50000	5	24	24	0.353333	150	density	effective
B	ARAHY.TIFRUNNER.GNM1.ANN1.LD9RN9	0.0437462	190	0.127057	0.907879	11	9.98667	0.0123096	0.247422	AraRoot36	PeanutIonome	B	50000	5	24	24	0.353333	150	density	effective
B	ARAHY.TIFRUNNER.GNM1.ANN1.L7CVHL	0.0230522	190	0.043418	0.907879	11	9.98667	0.0123096	0.247422	AraRoot36	PeanutIonome	B	50000	5	24	24	0.353333	150	density	effective
B	100kb 1
B	ARAHY.TIFRUNNER.GNM1.ANN1.0UTR6Y	0.366877	210	1.55901	1.69	1	1.69	0.00229545	0.233854	AraRoot36	PeanutIonome	B	100000	1	24	24	0.275	200	density	effective
B	ARAHY.TIFRUNNER.GNM1.ANN1.T0QXQZ	0.283177	210	1.2011	1.19833	3	3.595	0.00229545	0.233854	AraRoot36	PeanutIonome	B	100000	1	24	24	0.275	200	density	effective
B	ARAHY.TIFRUNNER.GNM1.ANN1.04D7UL	0.275893	210	1.16995	1.19833	3	3.595	0.00229545	0.233854	AraRoot36	PeanutIonome	B	100000	1	24	24	0.275	200	density	effective
B	ARAHY.TIFRUNNER.GNM1.ANN1.FYZ6HC	0.22764	210	0.963611	0.8325	6	4.995	0.00229545	0.233854	AraRoot36	PeanutIonome	B	100000	1	24	24	0.275	200	density	effective
B	ARAHY.TIFRUNNER.GNM1.ANN1.6Q1F8D	0.211142	210	0.893061	0.8325	6	4.995	0.00229545	0.233854	AraRoot36	PeanutIonome	B	100000	1	24	24	0.275	200	density	effective
B	ARAHY.TIFRUNNER.GNM1.ANN1.R7HDMF	0.200099	210	0.845842	0.8325	6	4.995	0.00229545	0.233854	AraRoot36	PeanutIonome	B	100000	1	24	24	0.275	200	density	effective
B	ARAHY.TIFRUNNER.GNM1.ANN1.Q758V8	0.133237	210	0.559929	0.928571	7	6.5	0.00229545	0.233854	AraRoot36	PeanutIonome	B	100000	1	24	24	0.275	200	density	effective
B	ARAHY.TIFRUNNER.GNM1.ANN1.KPV5JG	0.100683	210	0.420723	0.8415	10	8.415	0.00229545	0.233854	AraRoot36	PeanutIonome	B	100000	1	24	24	0.275	200	density	effective
B	ARAHY.TIFRUNNER.GNM1.ANN1.WF5RYQ	0.0969912	210	0.404934	0.8415	10	8.415	0.00229545	0.233854	AraRoot36	PeanutIonome	B	100000	1	24	24	0.275	200	density	effective
B	ARAHY.TIFRUNNER.GNM1.ANN1.69E4XE	0.0914858	210	0.381393	0.8415	10	8.415	0.00229545	0.233854	AraRoot36	PeanutIonome	B	100000	1	24	24	0.275	200	density	effective
B	ARAHY.TIFRUNNER.GNM1.ANN1.GE9U5Y	0.0380408	210	0.152853	0.795	13	10.335	0.00229545	0.233854	AraRoot36	PeanutIonome	B	100000	1	24	24	0.275	200	density	effective
B	ARAHY.TIFRUNNER.GNM1.ANN1.ITK2CB	0.0166798	210	0.06151	0.795	13	10.335	0.00229545	0.233854	AraRoot36	PeanutIonome	B	100000	1	24	24	0.275	200	density	effective
B	ARAHY.TIFRUNNER.GNM1.ANN1.L7CVHL	0.00976069	210	0.0319226	0.795	13	10.335	0.00229545	0.233854	AraRoot36	PeanutIonome	B	100000	1	24	24	0.275	200	density	effective
B	100kb 2
B	ARAHY.TIFRUNNER.GNM1.ANN1.0UTR6Y	0.419547	496	2.06074	1.03	1	1.03	0.00120792	0.203004	AraRoot36	PeanutIonome	B	100000	2	24	24	0.0742857	700	density	effective
B	ARAHY.TIFRUNNER.GNM1.ANN1.CH6R50	0.377752	496	1.85486	0.531429	3	1.59429	0.00120792	0.203004	AraRoot36	PeanutIonome	B	100000	2	24	24	0.0742857	700	density	effective
B	ARAHY.TIFRUNNER.GNM1.ANN1.T0Q3SI	0.360915	496	1.77192	0.531429	3	1.59429	0.00120792	0.203004	AraRoot36	PeanutIonome	B	100000	2	24	24	0.0742857	700	density	effective
B	ARAHY.TIFRUNNER.GNM1.ANN1.N938ZP	0.349304	496	1.71472	0.489143	5	2.44571	0.00120792	0.203004	AraRoot36	PeanutIonome	B	100000	2	24	24	0.0742857	700	density	effective
B	ARAHY.TIFRUNNER.GNM1.ANN1.K71R6P	0.306627	496	1.5045	0.489143	5	2.44571	0.00120792	0.203004	AraRoot36	PeanutIonome	B	100000	2	24	24	0.0742857	700	density	effective
B	ARAHY.TIFRUNNER.GNM1.ANN1.FYZ6HC	0.302857	496	1.48593	0.402857	9	3.62571	0.00120792	0.203004	AraRoot36	PeanutIonome	B	100000	2	24	24	0.0742857	700	density	effective
B	ARAHY.TIFRUNNER.GNM1.ANN1.04D7UL	0.272461	496	1.33619	0.402857	9	3.62571	0.00120792	0.203004	AraRoot36	PeanutIonome	B	100000	2	24	24	0.0742857	700	density	effective
B	ARAHY.TIFRUNNER.GNM1.ANN1.Q758V8	0.269344	496	1.32084	0.402857	9	3.62571	0.00120792	0.203004	AraRoot36	PeanutIonome	B	100000	2	24	24	0.0742857	700	density	effective
B	ARAHY.TIFRUNNER.GNM1.ANN1.GE9U5Y	0.266057	496	1.30465	0.402857	9	3.62571	0.00120792	0.203004	AraRoot36	PeanutIonome	B	100000	2	24	24	0.0742857	700	density	effective
B	ARAHY.TIFRUNNER.GNM1.ANN1.PQ8ST8	0.243029	496	1.19121	0.376429	14	5.27	0.00120792	0.203004	AraRoot36	PeanutIonome	B	100000	2	24	24	0.0742857	700	density	effective
B	ARAHY.TIFRUNNER.GNM1.ANN1.KPV5JG	0.223724	496	1.09612	0.376429	14	5.27	0.00120792	0.203004	AraRoot36	PeanutIonome	B	100000	2	24	24	0.0742857	700	density	effective
B	ARAHY.TIFRUNNER.GNM1.ANN1.ZW7540	0.214128	496	1.04885	0.376429	14	5.27	0.00120792	0.203004	AraRoot36	PeanutIonome	B	100000	2	24	24	0.0742857	700	density	effective
B	ARAHY.TIFRUNNER.GNM1.ANN1.T0QXQZ	0.209996	496	1.02849	0.376429	14	5.27	0.00120792	0.203004	AraRoot36	PeanutIonome	B	100000	2	24	24	0.0742857	700	density	effective
B	ARAHY.TIFRUNNER.GNM1.ANN1.H6S6U7	0.2074	496	1.0157	0.376429	14	5.27	0.00120792	0.203004	AraRoot36	PeanutIonome	B	100000	2	24	24	0.0742857	700	density	effective
B	ARAHY.TIFRUNNER.GNM1.ANN1.LD9RN9	0.128281	496	0.625961	0.587647	17	9.99	0.00120792	0.203004	AraRoot36	PeanutIonome	B	100000	2	24	24	0.0742857	700	density	effective
B	ARAHY.TIFRUNNER.GNM1.ANN1.84FS6Z	0.127618	496	0.622697	0.587647	17	9.99	0.00120792	0.203004	AraRoot36	PeanutIonome	B	100000	2	24	24	0.0742857	700	density	effective
B	ARAHY.TIFRUNNER.GNM1.ANN1.6Q1F8D	0.115737	496	0.564169	0.587647	17	9.99	0.00120792	0.203004	AraRoot36	PeanutIonome	B	100000	2	24	24	0.0742857	700	density	effective
B	ARAHY.TIFRUNNER.GNM1.ANN1.STSP6P	0.0996998	496	0.485171	0.674511	19	12.8157	0.00120792	0.203004	AraRoot36	PeanutIonome	B	100000	2	24	24	0.0742857	700	density	effective
B	ARAHY.TIFRUNNER.GNM1.ANN1.L7CVHL	0.0706184	496	0.341916	0.674511	19	12.8157	0.00120792	0.203004	AraRoot36	PeanutIonome	B	100000	2	24	24	0.0742857	700	density	effective
B	ARAHY.TIFRUNNER.GNM1.ANN1.WF5RYQ	0.050129	496	0.240986	0.724156	22	15.9314	0.00120792	0.203004	AraRoot36	PeanutIonome	B	100000	2	24	24	0.0742857	700	density	effective
B	ARAHY.TIFRUNNER.GNM1.ANN1.R7HDMF	0.042216	496	0.202006	0.724156	22	15.9314	0.00120792	0.203004	AraRoot36	PeanutIonome	B	100000	2	24	24	0.0742857	700	density	effective
B	ARAHY.TIFRUNNER.GNM1.ANN1.400PFG	0.0172856	496	0.0791985	0.724156	22	15.9314	0.00120792	0.203004	AraRoot36	PeanutIonome	B	100000	2	24	24	0.0742857	700	density	effective
B	100kb 5
B	ARAHY.TIFRUNNER.GNM1.ANN1.H6S6U7	0.351443	820	1.84342	0.65	3	1.95	0.00213187	0.189491	AraRoot36	PeanutIonome	B	100000	5	24	24	0.17	300	density	effective
B	ARAHY.TIFRUNNER.GNM1.ANN1.K71R6P	0.345052	820	1.8097	0.65	3	1.95	0.00213187	0.189491	AraRoot36	PeanutIonome	B	100000	5	24	24	0.17	300	density	effective
B	ARAHY.TIFRUNNER.GNM1.ANN1.Q758V8	0.33439	820	1.75343	0.65	3	1.95	0.00213187	0.189491	AraRoot36	PeanutIonome	B	100000	5	24	24	0.17	300	density	effective
B	ARAHY.TIFRUNNER.GNM1.ANN1.J67C2G	0.304594	820	1.59619	0.63	5	3.15	0.00213187	0.189491	AraRoot36	PeanutIonome	B	100000	5	24	24	0.17	300	density	effective
B	ARAHY.TIFRUNNER.GNM1.ANN1.0UTR6Y	0.298229	820	1.5626	0.63	5	3.15	0.00213187	0.189491	AraRoot36	PeanutIonome	B	100000	5	24	24	0.17	300	density	effective
B	ARAHY.TIFRUNNER.GNM1.ANN1.GE9U5Y	0.273049	820	1.42971	0.466	10	4.66	0.00213187	0.189491	AraRoot36	PeanutIonome	B	100000	5	24	24	0.17	300	density	effective
B	ARAHY.TIFRUNNER.GNM1.ANN1.N938ZP	0.271835	820	1.4233	0.466	10	4.66	0.00213187	0.189491	AraRoot36	PeanutIonome	B	100000	5	24	24	0.17	300	density	effective
B	ARAHY.TIFRUNNER.GNM1.ANN1.FYZ6HC	0.257125	820	1.34568	0.466	10	4.66	0.00213187	0.189491	AraRoot36	PeanutIonome	B	100000	5	24	24	0.17	300	density	effective
B	ARAHY.TIFRUNNER.GNM1.ANN1.B5QQYI	0.247004	820	1.29226	0.466	10	4.66	0.00213187	0.189491	AraRoot36	PeanutIonome	B	100000	5	24	24	0.17	300	density	effective
B	ARAHY.TIFRUNNER.GNM1.ANN1.CH6R50	0.244855	820	1.28092	0.466	10	4.66	0.00213187	0.189491	AraRoot36	PeanutIonome	B	100000	5	24	24	0.17	300	density	effective
B	ARAHY.TIFRUNNER.GNM1.ANN1.PQ8ST8	0.222125	820	1.16097	0.612727	11	6.74	0.00213187	0.189491	AraRoot36	PeanutIonome	B	100000	5	24	24	0.17	300	density	effective
B	ARAHY.TIFRUNNER.GNM1.ANN1.KPV5JG	0.18468	820	0.963362	0.630444	15	9.45667	0.00213187	0.189491	AraRoot36	PeanutIonome	B	100000	5	24	24	0.17	300	density	effective
B	ARAHY.TIFRUNNER.GNM1.ANN1.84FS6Z	0.183288	820	0.956017	0.630444	15	9.45667	0.00213187	0.189491	AraRoot36	PeanutIonome	B	100000	5	24	24	0.17	300	density	effective
B	ARAHY.TIFRUNNER.GNM1.ANN1.ZW7540	0.18059	820	0.941778	0.630444	15	9.45667	0.00213187	0.189491	AraRoot36	PeanutIonome	B	100000	5	24	24	0.17	300	density	effective
B	ARAHY.TIFRUNNER.GNM1.ANN1.04D7UL	0.157597	820	0.820436	0.630444	15	9.45667	0.00213187	0.189491	AraRoot36	PeanutIonome	B	100000	5	24	24	0.17	300	density	effective
B	ARAHY.TIFRUNNER.GNM1.ANN1.T0QXQZ	0.137204	820	0.712819	0.672281	19	12.7733	0.00213187	0.189491	AraRoot36	PeanutIonome	B	100000	5	24	24	0.17	300	density	effective
B	ARAHY.TIFRUNNER.GNM1.ANN1.T0Q3SI	0.133586	820	0.693725	0.672281	19	12.7733	0.00213187	0.189491	AraRoot36	PeanutIonome	B	100000	5	24	24	0.17	300	density	effective
B	ARAHY.TIFRUNNER.GNM1.ANN1.6Q1F8D	0.133358	820	0.692521	0.672281	19	12.7733	0.00213187	0.189491	AraRoot36	PeanutIonome	B	100000	5	24	24	0.17	300	density	effective
B	ARAHY.TIFRUNNER.GNM1.ANN1.7AT94J	0.11802	820	0.611577	0.672281	19	12.7733	0.00213187	0.189491	AraRoot36	PeanutIonome	B	100000	5	24	24	0.17	300	density	effective
B	ARAHY.TIFRUNNER.GNM1.ANN1.WF5RYQ	0.0406998	820	0.203535	0.975079	21	20.4767	0.00213187	0.189491	AraRoot36	PeanutIonome	B	100000	5	24	24	0.17	300	density	effective
B	ARAHY.TIFRUNNER.GNM1.ANN1.STSP6P	0.0195418	820	0.0918773	0.975079	21	20.4767	0.00213187	0.189491	AraRoot36	PeanutIonome	B	100000	5	24	24	0.17	300	density	effective
B	500 kb 1
B	ARAHY.TIFRUNNER.GNM1.ANN1.KK07FU	0.502356	666	2.68387	0.2295	2	0.459	-0.000986847	0.187544	AraRoot36	PeanutIonome	B	500000	1	24	24	0.015	1000	density	effective
B	ARAHY.TIFRUNNER.GNM1.ANN1.4AIN5Y	0.480597	666	2.56785	0.2295	2	0.459	-0.000986847	0.187544	AraRoot36	PeanutIonome	B	500000	1	24	24	0.015	1000	density	effective
B	ARAHY.TIFRUNNER.GNM1.ANN1.MV37LX	0.464101	666	2.47989	0.18175	4	0.727	-0.000986847	0.187544	AraRoot36	PeanutIonome	B	500000	1	24	24	0.015	1000	density	effective
B	ARAHY.TIFRUNNER.GNM1.ANN1.D73BWA	0.462821	666	2.47306	0.18175	4	0.727	-0.000986847	0.187544	AraRoot36	PeanutIonome	B	500000	1	24	24	0.015	1000	density	effective
B	ARAHY.TIFRUNNER.GNM1.ANN1.R7HDMF	0.407827	666	2.17983	0.196667	6	1.18	-0.000986847	0.187544	AraRoot36	PeanutIonome	B	500000	1	24	24	0.015	1000	density	effective
B	ARAHY.TIFRUNNER.GNM1.ANN1.TYST3V	0.378444	666	2.02316	0.196667	6	1.18	-0.000986847	0.187544	AraRoot36	PeanutIonome	B	500000	1	24	24	0.015	1000	density	effective
B	ARAHY.TIFRUNNER.GNM1.ANN1.7VP81J	0.357728	666	1.9127	0.2335	8	1.868	-0.000986847	0.187544	AraRoot36	PeanutIonome	B	500000	1	24	24	0.015	1000	density	effective
B	ARAHY.TIFRUNNER.GNM1.ANN1.YT3TY8	0.32884	666	1.75866	0.2335	8	1.868	-0.000986847	0.187544	AraRoot36	PeanutIonome	B	500000	1	24	24	0.015	1000	density	effective
B	ARAHY.TIFRUNNER.GNM1.ANN1.L7CVHL	0.260421	666	1.39385	0.431	10	4.31	-0.000986847	0.187544	AraRoot36	PeanutIonome	B	500000	1	24	24	0.015	1000	density	effective
B	ARAHY.TIFRUNNER.GNM1.ANN1.VWTK9Y	0.24933	666	1.33471	0.431	10	4.31	-0.000986847	0.187544	AraRoot36	PeanutIonome	B	500000	1	24	24	0.015	1000	density	effective
B	ARAHY.TIFRUNNER.GNM1.ANN1.X93NN8	0.219823	666	1.17737	0.436	14	6.104	-0.000986847	0.187544	AraRoot36	PeanutIonome	B	500000	1	24	24	0.015	1000	density	effective
B	ARAHY.TIFRUNNER.GNM1.ANN1.M8TE87	0.215194	666	1.1527	0.436	14	6.104	-0.000986847	0.187544	AraRoot36	PeanutIonome	B	500000	1	24	24	0.015	1000	density	effective
B	ARAHY.TIFRUNNER.GNM1.ANN1.HXS3HA	0.19589	666	1.04976	0.436	14	6.104	-0.000986847	0.187544	AraRoot36	PeanutIonome	B	500000	1	24	24	0.015	1000	density	effective
B	ARAHY.TIFRUNNER.GNM1.ANN1.J4S87V	0.189248	666	1.01435	0.436	14	6.104	-0.000986847	0.187544	AraRoot36	PeanutIonome	B	500000	1	24	24	0.015	1000	density	effective
B	ARAHY.TIFRUNNER.GNM1.ANN1.T0QXQZ	0.185808	666	0.996006	0.495	17	8.415	-0.000986847	0.187544	AraRoot36	PeanutIonome	B	500000	1	24	24	0.015	1000	density	effective
B	ARAHY.TIFRUNNER.GNM1.ANN1.Q8WI26	0.167267	666	0.897146	0.495	17	8.415	-0.000986847	0.187544	AraRoot36	PeanutIonome	B	500000	1	24	24	0.015	1000	density	effective
B	ARAHY.TIFRUNNER.GNM1.ANN1.84FS6Z	0.151639	666	0.813814	0.495	17	8.415	-0.000986847	0.187544	AraRoot36	PeanutIonome	B	500000	1	24	24	0.015	1000	density	effective
B	ARAHY.TIFRUNNER.GNM1.ANN1.STSP6P	0.13855	666	0.744025	0.473	24	11.352	-0.000986847	0.187544	AraRoot36	PeanutIonome	B	500000	1	24	24	0.015	1000	density	effective
B	ARAHY.TIFRUNNER.GNM1.ANN1.1R97WW	0.123634	666	0.66449	0.473	24	11.352	-0.000986847	0.187544	AraRoot36	PeanutIonome	B	500000	1	24	24	0.015	1000	density	effective
B	ARAHY.TIFRUNNER.GNM1.ANN1.Q758V8	0.114852	666	0.617662	0.473	24	11.352	-0.000986847	0.187544	AraRoot36	PeanutIonome	B	500000	1	24	24	0.015	1000	density	effective
B	ARAHY.TIFRUNNER.GNM1.ANN1.04D7UL	0.103256	666	0.555831	0.473	24	11.352	-0.000986847	0.187544	AraRoot36	PeanutIonome	B	500000	1	24	24	0.015	1000	density	effective
B	ARAHY.TIFRUNNER.GNM1.ANN1.0UTR6Y	0.0997579	666	0.53718	0.473	24	11.352	-0.000986847	0.187544	AraRoot36	PeanutIonome	B	500000	1	24	24	0.015	1000	density	effective
B	ARAHY.TIFRUNNER.GNM1.ANN1.FYZ6HC	0.0984786	666	0.530358	0.473	24	11.352	-0.000986847	0.187544	AraRoot36	PeanutIonome	B	500000	1	24	24	0.015	1000	density	effective
B	ARAHY.TIFRUNNER.GNM1.ANN1.69E4XE	0.098101	666	0.528345	0.473	24	11.352	-0.000986847	0.187544	AraRoot36	PeanutIonome	B	500000	1	24	24	0.015	1000	density	effective
B	ARAHY.TIFRUNNER.GNM1.ANN1.KPV5JG	0.0696033	666	0.376393	0.58784	25	14.696	-0.000986847	0.187544	AraRoot36	PeanutIonome	B	500000	1	24	24	0.015	1000	density	effective
B	ARAHY.TIFRUNNER.GNM1.ANN1.R12JL5	0.0153302	666	0.0870039	0.704577	26	18.319	-0.000986847	0.187544	AraRoot36	PeanutIonome	B	500000	1	24	24	0.015	1000	density	effective
B	500kb 2
B	ARAHY.TIFRUNNER.GNM1.ANN1.XP10PA	0.471457	2145	3.05442	0.256	1	0.256	-0.00150167	0.154844	AraRoot36	PeanutIonome	B	500000	2	24	24	0.049	1000	density	effective
B	ARAHY.TIFRUNNER.GNM1.ANN1.4VFV1G	0.399576	2145	2.59021	0.381	2	0.762	-0.00150167	0.154844	AraRoot36	PeanutIonome	B	500000	2	24	24	0.049	1000	density	effective
B	ARAHY.TIFRUNNER.GNM1.ANN1.STSP6P	0.350455	2145	2.27298	0.410333	3	1.231	-0.00150167	0.154844	AraRoot36	PeanutIonome	B	500000	2	24	24	0.049	1000	density	effective
B	ARAHY.TIFRUNNER.GNM1.ANN1.4AIN5Y	0.320442	2145	2.07915	0.489	4	1.956	-0.00150167	0.154844	AraRoot36	PeanutIonome	B	500000	2	24	24	0.049	1000	density	effective
B	ARAHY.TIFRUNNER.GNM1.ANN1.7VP81J	0.288374	2145	1.87205	0.443714	7	3.106	-0.00150167	0.154844	AraRoot36	PeanutIonome	B	500000	2	24	24	0.049	1000	density	effective
B	ARAHY.TIFRUNNER.GNM1.ANN1.KK07FU	0.277755	2145	1.80347	0.443714	7	3.106	-0.00150167	0.154844	AraRoot36	PeanutIonome	B	500000	2	24	24	0.049	1000	density	effective
B	ARAHY.TIFRUNNER.GNM1.ANN1.PQ8ST8	0.273581	2145	1.77652	0.443714	7	3.106	-0.00150167	0.154844	AraRoot36	PeanutIonome	B	500000	2	24	24	0.049	1000	density	effective
B	ARAHY.TIFRUNNER.GNM1.ANN1.MV37LX	0.244128	2145	1.5863	0.535333	9	4.818	-0.00150167	0.154844	AraRoot36	PeanutIonome	B	500000	2	24	24	0.049	1000	density	effective
B	ARAHY.TIFRUNNER.GNM1.ANN1.LD9RN9	0.232285	2145	1.50982	0.535333	9	4.818	-0.00150167	0.154844	AraRoot36	PeanutIonome	B	500000	2	24	24	0.049	1000	density	effective
B	ARAHY.TIFRUNNER.GNM1.ANN1.D73BWA	0.220743	2145	1.43528	0.655182	11	7.207	-0.00150167	0.154844	AraRoot36	PeanutIonome	B	500000	2	24	24	0.049	1000	density	effective
B	ARAHY.TIFRUNNER.GNM1.ANN1.J4S87V	0.213707	2145	1.38984	0.655182	11	7.207	-0.00150167	0.154844	AraRoot36	PeanutIonome	B	500000	2	24	24	0.049	1000	density	effective
B	ARAHY.TIFRUNNER.GNM1.ANN1.T0QXQZ	0.188825	2145	1.22915	0.52935	20	10.587	-0.00150167	0.154844	AraRoot36	PeanutIonome	B	500000	2	24	24	0.049	1000	density	effective
B	ARAHY.TIFRUNNER.GNM1.ANN1.TYST3V	0.188376	2145	1.22625	0.52935	20	10.587	-0.00150167	0.154844	AraRoot36	PeanutIonome	B	500000	2	24	24	0.049	1000	density	effective
B	ARAHY.TIFRUNNER.GNM1.ANN1.YT3TY8	0.178942	2145	1.16533	0.52935	20	10.587	-0.00150167	0.154844	AraRoot36	PeanutIonome	B	500000	2	24	24	0.049	1000	density	effective
B	ARAHY.TIFRUNNER.GNM1.ANN1.X93NN8	0.176823	2145	1.15164	0.52935	20	10.587	-0.00150167	0.154844	AraRoot36	PeanutIonome	B	500000	2	24	24	0.049	1000	density	effective
B	ARAHY.TIFRUNNER.GNM1.ANN1.R7HDMF	0.167087	2145	1.08877	0.52935	20	10.587	-0.00150167	0.154844	AraRoot36	PeanutIonome	B	500000	2	24	24	0.049	1000	density	effective
B	ARAHY.TIFRUNNER.GNM1.ANN1.T0Q3SI	0.163792	2145	1.06748	0.52935	20	10.587	-0.00150167	0.154844	AraRoot36	PeanutIonome	B	500000	2	24	24	0.049	1000	density	effective
B	ARAHY.TIFRUNNER.GNM1.ANN1.TAR5IY	0.15788	2145	1.0293	0.52935	20	10.587	-0.00150167	0.154844	AraRoot36	PeanutIonome	B	500000	2	24	24	0.049	1000	density	effective
B	ARAHY.TIFRUNNER.GNM1.ANN1.KPV5JG	0.157178	2145	1.02477	0.52935	20	10.587	-0.00150167	0.154844	AraRoot36	PeanutIonome	B	500000	2	24	24	0.049	1000	density	effective
B	ARAHY.TIFRUNNER.GNM1.ANN1.0UTR6Y	0.154303	2145	1.0062	0.52935	20	10.587	-0.00150167	0.154844	AraRoot36	PeanutIonome	B	500000	2	24	24	0.049	1000	density	effective
B	ARAHY.TIFRUNNER.GNM1.ANN1.L7CVHL	0.137926	2145	0.90044	0.553481	27	14.944	-0.00150167	0.154844	AraRoot36	PeanutIonome	B	500000	2	24	24	0.049	1000	density	effective
B	ARAHY.TIFRUNNER.GNM1.ANN1.69E4XE	0.130845	2145	0.854713	0.553481	27	14.944	-0.00150167	0.154844	AraRoot36	PeanutIonome	B	500000	2	24	24	0.049	1000	density	effective
B	ARAHY.TIFRUNNER.GNM1.ANN1.7JS6EV	0.130233	2145	0.850759	0.553481	27	14.944	-0.00150167	0.154844	AraRoot36	PeanutIonome	B	500000	2	24	24	0.049	1000	density	effective
B	ARAHY.TIFRUNNER.GNM1.ANN1.CH6R50	0.12902	2145	0.842927	0.553481	27	14.944	-0.00150167	0.154844	AraRoot36	PeanutIonome	B	500000	2	24	24	0.049	1000	density	effective
B	ARAHY.TIFRUNNER.GNM1.ANN1.VWTK9Y	0.127902	2145	0.835705	0.553481	27	14.944	-0.00150167	0.154844	AraRoot36	PeanutIonome	B	500000	2	24	24	0.049	1000	density	effective
B	ARAHY.TIFRUNNER.GNM1.ANN1.04D7UL	0.125877	2145	0.822629	0.553481	27	14.944	-0.00150167	0.154844	AraRoot36	PeanutIonome	B	500000	2	24	24	0.049	1000	density	effective
B	ARAHY.TIFRUNNER.GNM1.ANN1.1R97WW	0.121351	2145	0.793394	0.553481	27	14.944	-0.00150167	0.154844	AraRoot36	PeanutIonome	B	500000	2	24	24	0.049	1000	density	effective
B	ARAHY.TIFRUNNER.GNM1.ANN1.84FS6Z	0.0958757	2145	0.628874	0.652194	31	20.218	-0.00150167	0.154844	AraRoot36	PeanutIonome	B	500000	2	24	24	0.049	1000	density	effective
B	ARAHY.TIFRUNNER.GNM1.ANN1.GE9U5Y	0.0882636	2145	0.579715	0.652194	31	20.218	-0.00150167	0.154844	AraRoot36	PeanutIonome	B	500000	2	24	24	0.049	1000	density	effective
B	ARAHY.TIFRUNNER.GNM1.ANN1.Q758V8	0.0852841	2145	0.560473	0.652194	31	20.218	-0.00150167	0.154844	AraRoot36	PeanutIonome	B	500000	2	24	24	0.049	1000	density	effective
B	ARAHY.TIFRUNNER.GNM1.ANN1.6K7WYQ	0.0836326	2145	0.549807	0.652194	31	20.218	-0.00150167	0.154844	AraRoot36	PeanutIonome	B	500000	2	24	24	0.049	1000	density	effective
B	ARAHY.TIFRUNNER.GNM1.ANN1.400PFG	0.072726	2145	0.479371	0.7315	36	26.334	-0.00150167	0.154844	AraRoot36	PeanutIonome	B	500000	2	24	24	0.049	1000	density	effective
B	ARAHY.TIFRUNNER.GNM1.ANN1.5IIL4Y	0.0677595	2145	0.447297	0.7315	36	26.334	-0.00150167	0.154844	AraRoot36	PeanutIonome	B	500000	2	24	24	0.049	1000	density	effective
B	ARAHY.TIFRUNNER.GNM1.ANN1.Q8WI26	0.0666164	2145	0.439914	0.7315	36	26.334	-0.00150167	0.154844	AraRoot36	PeanutIonome	B	500000	2	24	24	0.049	1000	density	effective
B	ARAHY.TIFRUNNER.GNM1.ANN1.FYZ6HC	0.066082	2145	0.436463	0.7315	36	26.334	-0.00150167	0.154844	AraRoot36	PeanutIonome	B	500000	2	24	24	0.049	1000	density	effective
B	ARAHY.TIFRUNNER.GNM1.ANN1.78LN1U	0.0391162	2145	0.262315	0.7315	36	26.334	-0.00150167	0.154844	AraRoot36	PeanutIonome	B	500000	2	24	24	0.049	1000	density	effective
B	ARAHY.TIFRUNNER.GNM1.ANN1.H6S6U7	0.0337348	2145	0.227561	0.765256	43	32.906	-0.00150167	0.154844	AraRoot36	PeanutIonome	B	500000	2	24	24	0.049	1000	density	effective
B	ARAHY.TIFRUNNER.GNM1.ANN1.M8TE87	0.0281456	2145	0.191466	0.765256	43	32.906	-0.00150167	0.154844	AraRoot36	PeanutIonome	B	500000	2	24	24	0.049	1000	density	effective
B	ARAHY.TIFRUNNER.GNM1.ANN1.HXS3HA	0.0231157	2145	0.158982	0.765256	43	32.906	-0.00150167	0.154844	AraRoot36	PeanutIonome	B	500000	2	24	24	0.049	1000	density	effective
B	ARAHY.TIFRUNNER.GNM1.ANN1.49RQQB	0.0207249	2145	0.143541	0.765256	43	32.906	-0.00150167	0.154844	AraRoot36	PeanutIonome	B	500000	2	24	24	0.049	1000	density	effective
B	ARAHY.TIFRUNNER.GNM1.ANN1.PEW7PV	0.00690536	2145	0.0542936	0.765256	43	32.906	-0.00150167	0.154844	AraRoot36	PeanutIonome	B	500000	2	24	24	0.049	1000	density	effective
B	ARAHY.TIFRUNNER.GNM1.ANN1.K71R6P	0.00646652	2145	0.0514595	0.765256	43	32.906	-0.00150167	0.154844	AraRoot36	PeanutIonome	B	500000	2	24	24	0.049	1000	density	effective
B	ARAHY.TIFRUNNER.GNM1.ANN1.7W2QL6	0.00380509	2145	0.0342717	0.765256	43	32.906	-0.00150167	0.154844	AraRoot36	PeanutIonome	B	500000	2	24	24	0.049	1000	density	effective
B	500kb 5
B	ARAHY.TIFRUNNER.GNM1.ANN1.XP10PA	0.385304	8513	3.06095	0.41	1	0.41	-0.00176017	0.126453	AraRoot36	PeanutIonome	B	500000	5	24	24	0.325	200	density	effective
B	ARAHY.TIFRUNNER.GNM1.ANN1.GL2DWM	0.312674	8513	2.48658	1.16	2	2.32	-0.00176017	0.126453	AraRoot36	PeanutIonome	B	500000	5	24	24	0.325	200	density	effective
B	ARAHY.TIFRUNNER.GNM1.ANN1.JER3JH	0.269437	8513	2.14466	0.95875	4	3.835	-0.00176017	0.126453	AraRoot36	PeanutIonome	B	500000	5	24	24	0.325	200	density	effective
B	ARAHY.TIFRUNNER.GNM1.ANN1.XAYE67	0.264149	8513	2.10284	0.95875	4	3.835	-0.00176017	0.126453	AraRoot36	PeanutIonome	B	500000	5	24	24	0.325	200	density	effective
B	ARAHY.TIFRUNNER.GNM1.ANN1.KK07FU	0.238476	8513	1.89981	1.05	6	6.3	-0.00176017	0.126453	AraRoot36	PeanutIonome	B	500000	5	24	24	0.325	200	density	effective
B	ARAHY.TIFRUNNER.GNM1.ANN1.3J84P5	0.22466	8513	1.79056	1.05	6	6.3	-0.00176017	0.126453	AraRoot36	PeanutIonome	B	500000	5	24	24	0.325	200	density	effective
B	ARAHY.TIFRUNNER.GNM1.ANN1.8X9LLP	0.219377	8513	1.74877	0.749231	13	9.74	-0.00176017	0.126453	AraRoot36	PeanutIonome	B	500000	5	24	24	0.325	200	density	effective
B	ARAHY.TIFRUNNER.GNM1.ANN1.J4S87V	0.207526	8513	1.65506	0.749231	13	9.74	-0.00176017	0.126453	AraRoot36	PeanutIonome	B	500000	5	24	24	0.325	200	density	effective
B	ARAHY.TIFRUNNER.GNM1.ANN1.T0Q3SI	0.20266	8513	1.61658	0.749231	13	9.74	-0.00176017	0.126453	AraRoot36	PeanutIonome	B	500000	5	24	24	0.325	200	density	effective
B	ARAHY.TIFRUNNER.GNM1.ANN1.84FS6Z	0.199008	8513	1.5877	0.749231	13	9.74	-0.00176017	0.126453	AraRoot36	PeanutIonome	B	500000	5	24	24	0.325	200	density	effective
B	ARAHY.TIFRUNNER.GNM1.ANN1.0Y92P4	0.196118	8513	1.56484	0.749231	13	9.74	-0.00176017	0.126453	AraRoot36	PeanutIonome	B	500000	5	24	24	0.325	200	density	effective
B	ARAHY.TIFRUNNER.GNM1.ANN1.H6S6U7	0.18859	8513	1.50531	0.749231	13	9.74	-0.00176017	0.126453	AraRoot36	PeanutIonome	B	500000	5	24	24	0.325	200	density	effective
B	ARAHY.TIFRUNNER.GNM1.ANN1.4VFV1G	0.187926	8513	1.50006	0.749231	13	9.74	-0.00176017	0.126453	AraRoot36	PeanutIonome	B	500000	5	24	24	0.325	200	density	effective
B	ARAHY.TIFRUNNER.GNM1.ANN1.J67C2G	0.174431	8513	1.39334	0.816944	18	14.705	-0.00176017	0.126453	AraRoot36	PeanutIonome	B	500000	5	24	24	0.325	200	density	effective
B	ARAHY.TIFRUNNER.GNM1.ANN1.E7M0T9	0.170145	8513	1.35944	0.816944	18	14.705	-0.00176017	0.126453	AraRoot36	PeanutIonome	B	500000	5	24	24	0.325	200	density	effective
B	ARAHY.TIFRUNNER.GNM1.ANN1.2R2L9X	0.167169	8513	1.33591	0.816944	18	14.705	-0.00176017	0.126453	AraRoot36	PeanutIonome	B	500000	5	24	24	0.325	200	density	effective
B	ARAHY.TIFRUNNER.GNM1.ANN1.PYJ41C	0.162474	8513	1.29878	0.816944	18	14.705	-0.00176017	0.126453	AraRoot36	PeanutIonome	B	500000	5	24	24	0.325	200	density	effective
B	ARAHY.TIFRUNNER.GNM1.ANN1.ALKQ9T	0.162377	8513	1.29801	0.816944	18	14.705	-0.00176017	0.126453	AraRoot36	PeanutIonome	B	500000	5	24	24	0.325	200	density	effective
B	ARAHY.TIFRUNNER.GNM1.ANN1.Q758V8	0.155632	8513	1.24467	0.781852	27	21.11	-0.00176017	0.126453	AraRoot36	PeanutIonome	B	500000	5	24	24	0.325	200	density	effective
B	ARAHY.TIFRUNNER.GNM1.ANN1.FYZ6HC	0.137133	8513	1.09838	0.781852	27	21.11	-0.00176017	0.126453	AraRoot36	PeanutIonome	B	500000	5	24	24	0.325	200	density	effective
B	ARAHY.TIFRUNNER.GNM1.ANN1.4AIN5Y	0.133135	8513	1.06676	0.781852	27	21.11	-0.00176017	0.126453	AraRoot36	PeanutIonome	B	500000	5	24	24	0.325	200	density	effective
B	ARAHY.TIFRUNNER.GNM1.ANN1.7VP81J	0.13065	8513	1.04711	0.781852	27	21.11	-0.00176017	0.126453	AraRoot36	PeanutIonome	B	500000	5	24	24	0.325	200	density	effective
B	ARAHY.TIFRUNNER.GNM1.ANN1.KPV5JG	0.128338	8513	1.02883	0.781852	27	21.11	-0.00176017	0.126453	AraRoot36	PeanutIonome	B	500000	5	24	24	0.325	200	density	effective
B	ARAHY.TIFRUNNER.GNM1.ANN1.LD9RN9	0.126598	8513	1.01507	0.781852	27	21.11	-0.00176017	0.126453	AraRoot36	PeanutIonome	B	500000	5	24	24	0.325	200	density	effective
B	ARAHY.TIFRUNNER.GNM1.ANN1.1R97WW	0.126496	8513	1.01426	0.781852	27	21.11	-0.00176017	0.126453	AraRoot36	PeanutIonome	B	500000	5	24	24	0.325	200	density	effective
B	ARAHY.TIFRUNNER.GNM1.ANN1.DQCW8K	0.126131	8513	1.01138	0.781852	27	21.11	-0.00176017	0.126453	AraRoot36	PeanutIonome	B	500000	5	24	24	0.325	200	density	effective
B	ARAHY.TIFRUNNER.GNM1.ANN1.STSP6P	0.125065	8513	1.00294	0.781852	27	21.11	-0.00176017	0.126453	AraRoot36	PeanutIonome	B	500000	5	24	24	0.325	200	density	effective
B	ARAHY.TIFRUNNER.GNM1.ANN1.VWTK9Y	0.122816	8513	0.985163	0.760641	39	29.665	-0.00176017	0.126453	AraRoot36	PeanutIonome	B	500000	5	24	24	0.325	200	density	effective
B	ARAHY.TIFRUNNER.GNM1.ANN1.K71R6P	0.122382	8513	0.981727	0.760641	39	29.665	-0.00176017	0.126453	AraRoot36	PeanutIonome	B	500000	5	24	24	0.325	200	density	effective
B	ARAHY.TIFRUNNER.GNM1.ANN1.0UTR6Y	0.12007	8513	0.963445	0.760641	39	29.665	-0.00176017	0.126453	AraRoot36	PeanutIonome	B	500000	5	24	24	0.325	200	density	effective
B	ARAHY.TIFRUNNER.GNM1.ANN1.CH6R50	0.112325	8513	0.902196	0.760641	39	29.665	-0.00176017	0.126453	AraRoot36	PeanutIonome	B	500000	5	24	24	0.325	200	density	effective
B	ARAHY.TIFRUNNER.GNM1.ANN1.8954JJ	0.110586	8513	0.888444	0.760641	39	29.665	-0.00176017	0.126453	AraRoot36	PeanutIonome	B	500000	5	24	24	0.325	200	density	effective
B	ARAHY.TIFRUNNER.GNM1.ANN1.X93NN8	0.103068	8513	0.828995	0.760641	39	29.665	-0.00176017	0.126453	AraRoot36	PeanutIonome	B	500000	5	24	24	0.325	200	density	effective
B	ARAHY.TIFRUNNER.GNM1.ANN1.1W2FB9	0.0996072	8513	0.801624	0.760641	39	29.665	-0.00176017	0.126453	AraRoot36	PeanutIonome	B	500000	5	24	24	0.325	200	density	effective
B	ARAHY.TIFRUNNER.GNM1.ANN1.Q8WI26	0.0994862	8513	0.800667	0.760641	39	29.665	-0.00176017	0.126453	AraRoot36	PeanutIonome	B	500000	5	24	24	0.325	200	density	effective
B	ARAHY.TIFRUNNER.GNM1.ANN1.49RQQB	0.0992319	8513	0.798655	0.760641	39	29.665	-0.00176017	0.126453	AraRoot36	PeanutIonome	B	500000	5	24	24	0.325	200	density	effective
B	ARAHY.TIFRUNNER.GNM1.ANN1.PQ8ST8	0.0956898	8513	0.770644	0.760641	39	29.665	-0.00176017	0.126453	AraRoot36	PeanutIonome	B	500000	5	24	24	0.325	200	density	effective
B	ARAHY.TIFRUNNER.GNM1.ANN1.TYST3V	0.0944466	8513	0.760813	0.760641	39	29.665	-0.00176017	0.126453	AraRoot36	PeanutIonome	B	500000	5	24	24	0.325	200	density	effective
B	ARAHY.TIFRUNNER.GNM1.ANN1.B47NWK	0.0942761	8513	0.759465	0.760641	39	29.665	-0.00176017	0.126453	AraRoot36	PeanutIonome	B	500000	5	24	24	0.325	200	density	effective
B	ARAHY.TIFRUNNER.GNM1.ANN1.6K7WYQ	0.0836834	8513	0.675697	0.864891	46	39.785	-0.00176017	0.126453	AraRoot36	PeanutIonome	B	500000	5	24	24	0.325	200	density	effective
B	ARAHY.TIFRUNNER.GNM1.ANN1.R7HDMF	0.0823029	8513	0.664779	0.864891	46	39.785	-0.00176017	0.126453	AraRoot36	PeanutIonome	B	500000	5	24	24	0.325	200	density	effective
B	ARAHY.TIFRUNNER.GNM1.ANN1.TPCS2D	0.0779487	8513	0.630346	0.864891	46	39.785	-0.00176017	0.126453	AraRoot36	PeanutIonome	B	500000	5	24	24	0.325	200	density	effective
B	ARAHY.TIFRUNNER.GNM1.ANN1.T0QXQZ	0.0684678	8513	0.55537	0.864891	46	39.785	-0.00176017	0.126453	AraRoot36	PeanutIonome	B	500000	5	24	24	0.325	200	density	effective
B	ARAHY.TIFRUNNER.GNM1.ANN1.ZAN4A4	0.0665876	8513	0.540501	0.864891	46	39.785	-0.00176017	0.126453	AraRoot36	PeanutIonome	B	500000	5	24	24	0.325	200	density	effective
B	ARAHY.TIFRUNNER.GNM1.ANN1.NCN9PA	0.0651549	8513	0.529171	0.864891	46	39.785	-0.00176017	0.126453	AraRoot36	PeanutIonome	B	500000	5	24	24	0.325	200	density	effective
B	ARAHY.TIFRUNNER.GNM1.ANN1.GE9U5Y	0.0615185	8513	0.500415	0.864891	46	39.785	-0.00176017	0.126453	AraRoot36	PeanutIonome	B	500000	5	24	24	0.325	200	density	effective
B	ARAHY.TIFRUNNER.GNM1.ANN1.7AT94J	0.0603952	8513	0.491531	0.857917	60	51.475	-0.00176017	0.126453	AraRoot36	PeanutIonome	B	500000	5	24	24	0.325	200	density	effective
B	ARAHY.TIFRUNNER.GNM1.ANN1.PG0H7H	0.0576697	8513	0.469977	0.857917	60	51.475	-0.00176017	0.126453	AraRoot36	PeanutIonome	B	500000	5	24	24	0.325	200	density	effective
B	ARAHY.TIFRUNNER.GNM1.ANN1.SJGE27	0.0534517	8513	0.436621	0.857917	60	51.475	-0.00176017	0.126453	AraRoot36	PeanutIonome	B	500000	5	24	24	0.325	200	density	effective
B	ARAHY.TIFRUNNER.GNM1.ANN1.04D7UL	0.0470764	8513	0.386205	0.857917	60	51.475	-0.00176017	0.126453	AraRoot36	PeanutIonome	B	500000	5	24	24	0.325	200	density	effective
B	ARAHY.TIFRUNNER.GNM1.ANN1.0DMM9R	0.0436385	8513	0.359017	0.857917	60	51.475	-0.00176017	0.126453	AraRoot36	PeanutIonome	B	500000	5	24	24	0.325	200	density	effective
B	ARAHY.TIFRUNNER.GNM1.ANN1.B46INW	0.0427073	8513	0.351653	0.857917	60	51.475	-0.00176017	0.126453	AraRoot36	PeanutIonome	B	500000	5	24	24	0.325	200	density	effective
B	ARAHY.TIFRUNNER.GNM1.ANN1.YT3TY8	0.0420529	8513	0.346478	0.857917	60	51.475	-0.00176017	0.126453	AraRoot36	PeanutIonome	B	500000	5	24	24	0.325	200	density	effective
B	ARAHY.TIFRUNNER.GNM1.ANN1.PEW7PV	0.0413735	8513	0.341106	0.857917	60	51.475	-0.00176017	0.126453	AraRoot36	PeanutIonome	B	500000	5	24	24	0.325	200	density	effective
B	ARAHY.TIFRUNNER.GNM1.ANN1.H7WPER	0.0382737	8513	0.316592	0.857917	60	51.475	-0.00176017	0.126453	AraRoot36	PeanutIonome	B	500000	5	24	24	0.325	200	density	effective
B	ARAHY.TIFRUNNER.GNM1.ANN1.78LN1U	0.0380235	8513	0.314613	0.857917	60	51.475	-0.00176017	0.126453	AraRoot36	PeanutIonome	B	500000	5	24	24	0.325	200	density	effective
B	ARAHY.TIFRUNNER.GNM1.ANN1.ZW7540	0.0377825	8513	0.312708	0.857917	60	51.475	-0.00176017	0.126453	AraRoot36	PeanutIonome	B	500000	5	24	24	0.325	200	density	effective
B	ARAHY.TIFRUNNER.GNM1.ANN1.D73BWA	0.0320212	8513	0.267146	0.857917	60	51.475	-0.00176017	0.126453	AraRoot36	PeanutIonome	B	500000	5	24	24	0.325	200	density	effective
B	ARAHY.TIFRUNNER.GNM1.ANN1.TAR5IY	0.0317452	8513	0.264964	0.857917	60	51.475	-0.00176017	0.126453	AraRoot36	PeanutIonome	B	500000	5	24	24	0.325	200	density	effective
B	ARAHY.TIFRUNNER.GNM1.ANN1.MV37LX	0.0313391	8513	0.261753	0.857917	60	51.475	-0.00176017	0.126453	AraRoot36	PeanutIonome	B	500000	5	24	24	0.325	200	density	effective
B	ARAHY.TIFRUNNER.GNM1.ANN1.5IIL4Y	0.0293807	8513	0.246265	0.96694	67	64.785	-0.00176017	0.126453	AraRoot36	PeanutIonome	B	500000	5	24	24	0.325	200	density	effective
B	ARAHY.TIFRUNNER.GNM1.ANN1.B3FCUF	0.0289306	8513	0.242706	0.96694	67	64.785	-0.00176017	0.126453	AraRoot36	PeanutIonome	B	500000	5	24	24	0.325	200	density	effective
B	ARAHY.TIFRUNNER.GNM1.ANN1.DXW5L8	0.0276523	8513	0.232597	0.96694	67	64.785	-0.00176017	0.126453	AraRoot36	PeanutIonome	B	500000	5	24	24	0.325	200	density	effective
B	ARAHY.TIFRUNNER.GNM1.ANN1.3T3YD2	0.0246419	8513	0.20879	0.96694	67	64.785	-0.00176017	0.126453	AraRoot36	PeanutIonome	B	500000	5	24	24	0.325	200	density	effective
B	ARAHY.TIFRUNNER.GNM1.ANN1.QXP7G7	0.0236642	8513	0.201059	0.96694	67	64.785	-0.00176017	0.126453	AraRoot36	PeanutIonome	B	500000	5	24	24	0.325	200	density	effective
B	ARAHY.TIFRUNNER.GNM1.ANN1.L2HUY0	0.0120512	8513	0.109222	0.96694	67	64.785	-0.00176017	0.126453	AraRoot36	PeanutIonome	B	500000	5	24	24	0.325	200	density	effective
B	ARAHY.TIFRUNNER.GNM1.ANN1.400PFG	0.0116482	8513	0.106035	0.96694	67	64.785	-0.00176017	0.126453	AraRoot36	PeanutIonome	B	500000	5	24	24	0.325	200	density	effective
Cu	500kb 2
Cu	ARAHY.TIFRUNNER.GNM1.ANN1.3YA759	0.432883	15	0.811786	1.5	1	1.5	-0.0150385	0.551773	AraRoot36	PeanutIonome	Cu	500000	2	2	2	0.58	100	density	effective
Cu	ARAHY.TIFRUNNER.GNM1.ANN1.E27NE4	0.289969	15	0.552778	0.99	2	1.98	-0.0150385	0.551773	AraRoot36	PeanutIonome	Cu	500000	2	2	2	0.58	100	density	effective
Cu	500kb 5
Cu	ARAHY.TIFRUNNER.GNM1.ANN1.W7NSCD	0.713975	45	1.57514	1	1	1	0.0246538	0.437627	AraRoot36	PeanutIonome	Cu	500000	5	2	2	0.88	100	density	effective
Cu	ARAHY.TIFRUNNER.GNM1.ANN1.85G0UF	0.185231	45	0.366926	2.09	2	4.18	0.0246538	0.437627	AraRoot36	PeanutIonome	Cu	500000	5	2	2	0.88	100	density	effective
Na	50kb 1
Na	ARAHY.TIFRUNNER.GNM1.ANN1.ZUT0YB	0.752405	10	1.69103	0.72	1	0.72	0.0292801	0.427624	AraRoot36	PeanutIonome	Na	50000	1	6	6	0.51	100	density	effective
Na	50kb 2
Na	ARAHY.TIFRUNNER.GNM1.ANN1.ZUT0YB	0.203855	28	0.456871	1.675	2	3.35	0.0307338	0.378927	AraRoot36	PeanutIonome	Na	50000	2	6	6	0.79	100	density	effective
Na	ARAHY.TIFRUNNER.GNM1.ANN1.L0LQMM	0.139954	28	0.288235	1.675	2	3.35	0.0307338	0.378927	AraRoot36	PeanutIonome	Na	50000	2	6	6	0.79	100	density	effective
Na	50kb 5
Na	ARAHY.TIFRUNNER.GNM1.ANN1.ZUT0YB	0.203855	28	0.489374	1.68	2	3.36	0.0130106	0.389976	AraRoot36	PeanutIonome	Na	50000	5	6	6	0.74	100	density	effective
Na	ARAHY.TIFRUNNER.GNM1.ANN1.L0LQMM	0.139954	28	0.325515	1.68	2	3.36	0.0130106	0.389976	AraRoot36	PeanutIonome	Na	50000	5	6	6	0.74	100	density	effective
Na	ARAHY.TIFRUNNER.GNM1.ANN1.CDLA1L	0.0163196	28	0.00848508	1.29333	3	3.88	0.0130106	0.389976	AraRoot36	PeanutIonome	Na	50000	5	6	6	0.74	100	density	effective
Na	100kb 1
Na	ARAHY.TIFRUNNER.GNM1.ANN1.KQD4NT	0.843164	15	2.10789	0.2	2	0.4	0.0284767	0.386494	AraRoot36	PeanutIonome	Na	100000	1	6	6	0.224	250	density	effective
Na	ARAHY.TIFRUNNER.GNM1.ANN1.ZUT0YB	0.81701	15	2.04022	0.2	2	0.4	0.0284767	0.386494	AraRoot36	PeanutIonome	Na	100000	1	6	6	0.224	250	density	effective
Na	ARAHY.TIFRUNNER.GNM1.ANN1.CDLA1L	0.278909	15	0.647961	0.672	3	2.016	0.0284767	0.386494	AraRoot36	PeanutIonome	Na	100000	1	6	6	0.224	250	density	effective
Na	100kb 2
Na	ARAHY.TIFRUNNER.GNM1.ANN1.KQD4NT	0.788841	45	2.28279	0.22	1	0.22	-0.00173145	0.346319	AraRoot36	PeanutIonome	Na	100000	2	6	6	0.275	200	density	effective
Na	ARAHY.TIFRUNNER.GNM1.ANN1.L0LQMM	0.450872	45	1.3069	0.6875	2	1.375	-0.00173145	0.346319	AraRoot36	PeanutIonome	Na	100000	2	6	6	0.275	200	density	effective
Na	ARAHY.TIFRUNNER.GNM1.ANN1.ZUT0YB	0.323159	45	0.938125	0.6275	4	2.51	-0.00173145	0.346319	AraRoot36	PeanutIonome	Na	100000	2	6	6	0.275	200	density	effective
Na	ARAHY.TIFRUNNER.GNM1.ANN1.PDVV0K	0.262615	45	0.763304	0.6275	4	2.51	-0.00173145	0.346319	AraRoot36	PeanutIonome	Na	100000	2	6	6	0.275	200	density	effective
Na	ARAHY.TIFRUNNER.GNM1.ANN1.CDLA1L	0.241975	45	0.703704	0.560833	6	3.365	-0.00173145	0.346319	AraRoot36	PeanutIonome	Na	100000	2	6	6	0.275	200	density	effective
Na	ARAHY.TIFRUNNER.GNM1.ANN1.JT7MF5	0.20449	45	0.595468	0.560833	6	3.365	-0.00173145	0.346319	AraRoot36	PeanutIonome	Na	100000	2	6	6	0.275	200	density	effective
Na	ARAHY.TIFRUNNER.GNM1.ANN1.M0JNNK	0.013331	45	0.0434931	0.716429	7	5.015	-0.00173145	0.346319	AraRoot36	PeanutIonome	Na	100000	2	6	6	0.275	200	density	effective
Na	100kb 5
Na	ARAHY.TIFRUNNER.GNM1.ANN1.KQD4NT	0.909319	66	2.74833	0.2	1	0.2	0.00098081	0.330506	AraRoot36	PeanutIonome	Na	100000	5	6	6	0.22	250	density	effective
Na	ARAHY.TIFRUNNER.GNM1.ANN1.L0LQMM	0.491424	66	1.48392	0.794	2	1.588	0.00098081	0.330506	AraRoot36	PeanutIonome	Na	100000	5	6	6	0.22	250	density	effective
Na	ARAHY.TIFRUNNER.GNM1.ANN1.CDLA1L	0.279282	66	0.842046	0.747	4	2.988	0.00098081	0.330506	AraRoot36	PeanutIonome	Na	100000	5	6	6	0.22	250	density	effective
Na	ARAHY.TIFRUNNER.GNM1.ANN1.ZUT0YB	0.271814	66	0.81945	0.747	4	2.988	0.00098081	0.330506	AraRoot36	PeanutIonome	Na	100000	5	6	6	0.22	250	density	effective
Na	ARAHY.TIFRUNNER.GNM1.ANN1.JT7MF5	0.233276	66	0.702848	0.7688	5	3.844	0.00098081	0.330506	AraRoot36	PeanutIonome	Na	100000	5	6	6	0.22	250	density	effective
Na	ARAHY.TIFRUNNER.GNM1.ANN1.PDVV0K	0.142542	66	0.428318	0.686286	7	4.804	0.00098081	0.330506	AraRoot36	PeanutIonome	Na	100000	5	6	6	0.22	250	density	effective
Na	ARAHY.TIFRUNNER.GNM1.ANN1.H4NWU4	0.14095	66	0.4235	0.686286	7	4.804	0.00098081	0.330506	AraRoot36	PeanutIonome	Na	100000	5	6	6	0.22	250	density	effective
Na	ARAHY.TIFRUNNER.GNM1.ANN1.M0JNNK	0.0732799	66	0.218753	0.7405	8	5.924	0.00098081	0.330506	AraRoot36	PeanutIonome	Na	100000	5	6	6	0.22	250	density	effective
Na	500kb 1
Na	ARAHY.TIFRUNNER.GNM1.ANN1.ZUT0YB	0.501182	45	1.66418	0.965714	1	0.965714	-0.0253326	0.316381	AraRoot36	PeanutIonome	Na	500000	1	6	6	0.174286	350	density	effective
Na	ARAHY.TIFRUNNER.GNM1.ANN1.WSU996	0.437381	45	1.46252	0.460952	3	1.38286	-0.0253326	0.316381	AraRoot36	PeanutIonome	Na	500000	1	6	6	0.174286	350	density	effective
Na	ARAHY.TIFRUNNER.GNM1.ANN1.IMCF17	0.409853	45	1.37551	0.460952	3	1.38286	-0.0253326	0.316381	AraRoot36	PeanutIonome	Na	500000	1	6	6	0.174286	350	density	effective
Na	ARAHY.TIFRUNNER.GNM1.ANN1.GKQN4T	0.29262	45	1.00497	0.476429	4	1.90571	-0.0253326	0.316381	AraRoot36	PeanutIonome	Na	500000	1	6	6	0.174286	350	density	effective
Na	ARAHY.TIFRUNNER.GNM1.ANN1.F03U7D	0.100144	45	0.396601	0.674286	6	4.04571	-0.0253326	0.316381	AraRoot36	PeanutIonome	Na	500000	1	6	6	0.174286	350	density	effective
Na	ARAHY.TIFRUNNER.GNM1.ANN1.CDLA1L	0.0996269	45	0.394965	0.674286	6	4.04571	-0.0253326	0.316381	AraRoot36	PeanutIonome	Na	500000	1	6	6	0.174286	350	density	effective
Na	ARAHY.TIFRUNNER.GNM1.ANN1.S89UIY	0.05318	45	0.248158	0.608214	8	4.86571	-0.0253326	0.316381	AraRoot36	PeanutIonome	Na	500000	1	6	6	0.174286	350	density	effective
Na	ARAHY.TIFRUNNER.GNM1.ANN1.KQD4NT	-0.0156749	45	0.0305255	0.608214	8	4.86571	-0.0253326	0.316381	AraRoot36	PeanutIonome	Na	500000	1	6	6	0.174286	350	density	effective
Na	500kb 2
Na	ARAHY.TIFRUNNER.GNM1.ANN1.T0P5W2	0.463488	153	1.69205	1.4625	1	1.4625	0.00392691	0.2716	AraRoot36	PeanutIonome	Na	500000	2	6	6	0.14	400	density	effective
Na	ARAHY.TIFRUNNER.GNM1.ANN1.8KRZ7W	0.390361	153	1.42281	1.115	2	2.23	0.00392691	0.2716	AraRoot36	PeanutIonome	Na	500000	2	6	6	0.14	400	density	effective
Na	ARAHY.TIFRUNNER.GNM1.ANN1.IMCF17	0.334186	153	1.21597	0.76375	4	3.055	0.00392691	0.2716	AraRoot36	PeanutIonome	Na	500000	2	6	6	0.14	400	density	effective
Na	ARAHY.TIFRUNNER.GNM1.ANN1.PDVV0K	0.328998	153	1.19688	0.76375	4	3.055	0.00392691	0.2716	AraRoot36	PeanutIonome	Na	500000	2	6	6	0.14	400	density	effective
Na	ARAHY.TIFRUNNER.GNM1.ANN1.D7NBKG	0.234872	153	0.850312	0.8375	5	4.1875	0.00392691	0.2716	AraRoot36	PeanutIonome	Na	500000	2	6	6	0.14	400	density	effective
Na	ARAHY.TIFRUNNER.GNM1.ANN1.KQD4NT	0.185918	153	0.670072	0.705937	8	5.6475	0.00392691	0.2716	AraRoot36	PeanutIonome	Na	500000	2	6	6	0.14	400	density	effective
Na	ARAHY.TIFRUNNER.GNM1.ANN1.GKQN4T	0.173533	153	0.62447	0.705937	8	5.6475	0.00392691	0.2716	AraRoot36	PeanutIonome	Na	500000	2	6	6	0.14	400	density	effective
Na	ARAHY.TIFRUNNER.GNM1.ANN1.WSU996	0.17273	153	0.621513	0.705937	8	5.6475	0.00392691	0.2716	AraRoot36	PeanutIonome	Na	500000	2	6	6	0.14	400	density	effective
Na	ARAHY.TIFRUNNER.GNM1.ANN1.F03U7D	0.136929	153	0.4897	0.807778	9	7.27	0.00392691	0.2716	AraRoot36	PeanutIonome	Na	500000	2	6	6	0.14	400	density	effective
Na	ARAHY.TIFRUNNER.GNM1.ANN1.L0LQMM	0.055989	153	0.191687	0.694615	13	9.03	0.00392691	0.2716	AraRoot36	PeanutIonome	Na	500000	2	6	6	0.14	400	density	effective
Na	ARAHY.TIFRUNNER.GNM1.ANN1.JT7MF5	0.0503791	153	0.171032	0.694615	13	9.03	0.00392691	0.2716	AraRoot36	PeanutIonome	Na	500000	2	6	6	0.14	400	density	effective
Na	ARAHY.TIFRUNNER.GNM1.ANN1.CDLA1L	0.049243	153	0.166849	0.694615	13	9.03	0.00392691	0.2716	AraRoot36	PeanutIonome	Na	500000	2	6	6	0.14	400	density	effective
Na	ARAHY.TIFRUNNER.GNM1.ANN1.ZUT0YB	0.0371417	153	0.122293	0.694615	13	9.03	0.00392691	0.2716	AraRoot36	PeanutIonome	Na	500000	2	6	6	0.14	400	density	effective
Na	500kb 5
Na	ARAHY.TIFRUNNER.GNM1.ANN1.T0P5W2	0.420033	780	2.10066	1.3	1	1.3	-0.00467709	0.202179	AraRoot36	PeanutIonome	Na	500000	5	6	6	0.28	200	density	effective
Na	ARAHY.TIFRUNNER.GNM1.ANN1.P54N2F	0.286083	780	1.43813	1.495	3	4.485	-0.00467709	0.202179	AraRoot36	PeanutIonome	Na	500000	5	6	6	0.28	200	density	effective
Na	ARAHY.TIFRUNNER.GNM1.ANN1.TB2MDL	0.261641	780	1.31724	1.495	3	4.485	-0.00467709	0.202179	AraRoot36	PeanutIonome	Na	500000	5	6	6	0.28	200	density	effective
Na	ARAHY.TIFRUNNER.GNM1.ANN1.G7F7H8	0.221906	780	1.1207	1.07167	6	6.43	-0.00467709	0.202179	AraRoot36	PeanutIonome	Na	500000	5	6	6	0.28	200	density	effective
Na	ARAHY.TIFRUNNER.GNM1.ANN1.BIC9WM	0.200842	780	1.01652	1.07167	6	6.43	-0.00467709	0.202179	AraRoot36	PeanutIonome	Na	500000	5	6	6	0.28	200	density	effective
Na	ARAHY.TIFRUNNER.GNM1.ANN1.8AL6VH	0.199171	780	1.00825	1.07167	6	6.43	-0.00467709	0.202179	AraRoot36	PeanutIonome	Na	500000	5	6	6	0.28	200	density	effective
Na	ARAHY.TIFRUNNER.GNM1.ANN1.IMCF17	0.1856	780	0.941129	0.9255	10	9.255	-0.00467709	0.202179	AraRoot36	PeanutIonome	Na	500000	5	6	6	0.28	200	density	effective
Na	ARAHY.TIFRUNNER.GNM1.ANN1.PDVV0K	0.181032	780	0.918538	0.9255	10	9.255	-0.00467709	0.202179	AraRoot36	PeanutIonome	Na	500000	5	6	6	0.28	200	density	effective
Na	ARAHY.TIFRUNNER.GNM1.ANN1.MJ7V8R	0.174227	780	0.884877	0.9255	10	9.255	-0.00467709	0.202179	AraRoot36	PeanutIonome	Na	500000	5	6	6	0.28	200	density	effective
Na	ARAHY.TIFRUNNER.GNM1.ANN1.L0LQMM	0.148272	780	0.756504	0.9255	10	9.255	-0.00467709	0.202179	AraRoot36	PeanutIonome	Na	500000	5	6	6	0.28	200	density	effective
Na	ARAHY.TIFRUNNER.GNM1.ANN1.Y4R2VT	0.141438	780	0.722699	0.957308	13	12.445	-0.00467709	0.202179	AraRoot36	PeanutIonome	Na	500000	5	6	6	0.28	200	density	effective
Na	ARAHY.TIFRUNNER.GNM1.ANN1.P4GVCP	0.134848	780	0.690105	0.957308	13	12.445	-0.00467709	0.202179	AraRoot36	PeanutIonome	Na	500000	5	6	6	0.28	200	density	effective
Na	ARAHY.TIFRUNNER.GNM1.ANN1.KQD4NT	0.106125	780	0.548041	0.957308	13	12.445	-0.00467709	0.202179	AraRoot36	PeanutIonome	Na	500000	5	6	6	0.28	200	density	effective
Na	ARAHY.TIFRUNNER.GNM1.ANN1.GKQN4T	0.0893647	780	0.46514	0.727955	22	16.015	-0.00467709	0.202179	AraRoot36	PeanutIonome	Na	500000	5	6	6	0.28	200	density	effective
Na	ARAHY.TIFRUNNER.GNM1.ANN1.IXNR8T	0.0801046	780	0.419339	0.727955	22	16.015	-0.00467709	0.202179	AraRoot36	PeanutIonome	Na	500000	5	6	6	0.28	200	density	effective
Na	ARAHY.TIFRUNNER.GNM1.ANN1.6CR1D2	0.0786915	780	0.41235	0.727955	22	16.015	-0.00467709	0.202179	AraRoot36	PeanutIonome	Na	500000	5	6	6	0.28	200	density	effective
Na	ARAHY.TIFRUNNER.GNM1.ANN1.8KRZ7W	0.0759617	780	0.398848	0.727955	22	16.015	-0.00467709	0.202179	AraRoot36	PeanutIonome	Na	500000	5	6	6	0.28	200	density	effective
Na	ARAHY.TIFRUNNER.GNM1.ANN1.M0JNNK	0.0695596	780	0.367183	0.727955	22	16.015	-0.00467709	0.202179	AraRoot36	PeanutIonome	Na	500000	5	6	6	0.28	200	density	effective
Na	ARAHY.TIFRUNNER.GNM1.ANN1.26LTEF	0.0655821	780	0.347509	0.727955	22	16.015	-0.00467709	0.202179	AraRoot36	PeanutIonome	Na	500000	5	6	6	0.28	200	density	effective
Na	ARAHY.TIFRUNNER.GNM1.ANN1.ZUT0YB	0.0652073	780	0.345656	0.727955	22	16.015	-0.00467709	0.202179	AraRoot36	PeanutIonome	Na	500000	5	6	6	0.28	200	density	effective
Na	ARAHY.TIFRUNNER.GNM1.ANN1.D7NBKG	0.0632565	780	0.336006	0.727955	22	16.015	-0.00467709	0.202179	AraRoot36	PeanutIonome	Na	500000	5	6	6	0.28	200	density	effective
Na	ARAHY.TIFRUNNER.GNM1.ANN1.4H7469	0.0469551	780	0.255378	0.727955	22	16.015	-0.00467709	0.202179	AraRoot36	PeanutIonome	Na	500000	5	6	6	0.28	200	density	effective
Na	ARAHY.TIFRUNNER.GNM1.ANN1.HCD3KF	0.0317114	780	0.179981	0.7956	25	19.89	-0.00467709	0.202179	AraRoot36	PeanutIonome	Na	500000	5	6	6	0.28	200	density	effective
Na	ARAHY.TIFRUNNER.GNM1.ANN1.JT7MF5	0.0153119	780	0.0988674	0.7956	25	19.89	-0.00467709	0.202179	AraRoot36	PeanutIonome	Na	500000	5	6	6	0.28	200	density	effective
Na	ARAHY.TIFRUNNER.GNM1.ANN1.CDLA1L	0.00903259	780	0.0678095	0.7956	25	19.89	-0.00467709	0.202179	AraRoot36	PeanutIonome	Na	500000	5	6	6	0.28	200	density	effective
S	500kb 2
S	ARAHY.TIFRUNNER.GNM1.ANN1.N76Q1G	0.112255	10	0.407797	2.27	1	2.27	-0.0827054	0.478082	AraRoot36	PeanutIonome	S	500000	2	3	3	0.92	100	density	effective
S	500kb 5
S	ARAHY.TIFRUNNER.GNM1.ANN1.N76Q1G	0.112255	10	0.197762	2.34	1	2.34	0.0150593	0.49148	AraRoot36	PeanutIonome	S	500000	5	3	3	1	100	density	effective

## Sheet: Data Set 4
Data Set 4. Prioritized genes with fdr<0.3 related to elemental accumulation.
Traits	gene	score	num_trans_edges	zscore	fdr	num_real	num_random	bs_mean	bs_std	COB	Ontology	Term	WindowSize	FlankLimit	TermLoci	TermCollapsedLoci	TermPValue	NumBootstraps	Method	SNP2Gene
B	500 kb 1
B	ARAHY.TIFRUNNER.GNM1.ANN1.KK07FU	0.502356	666	2.68387	0.2295	2	0.459	-0.000986847	0.187544	AraRoot35	PeanutIonome	B	500000	1	24	24	0.015	1000	density	effective
B	ARAHY.TIFRUNNER.GNM1.ANN1.4AIN5Y	0.480597	666	2.56785	0.2295	2	0.459	-0.000986847	0.187544	AraRoot35	PeanutIonome	B	500000	1	24	24	0.015	1000	density	effective
B	ARAHY.TIFRUNNER.GNM1.ANN1.MV37LX	0.464101	666	2.47989	0.18175	4	0.727	-0.000986847	0.187544	AraRoot35	PeanutIonome	B	500000	1	24	24	0.015	1000	density	effective
B	ARAHY.TIFRUNNER.GNM1.ANN1.D73BWA	0.462821	666	2.47306	0.18175	4	0.727	-0.000986847	0.187544	AraRoot35	PeanutIonome	B	500000	1	24	24	0.015	1000	density	effective
B	ARAHY.TIFRUNNER.GNM1.ANN1.R7HDMF	0.407827	666	2.17983	0.196667	6	1.18	-0.000986847	0.187544	AraRoot35	PeanutIonome	B	500000	1	24	24	0.015	1000	density	effective
B	ARAHY.TIFRUNNER.GNM1.ANN1.TYST3V	0.378444	666	2.02316	0.196667	6	1.18	-0.000986847	0.187544	AraRoot35	PeanutIonome	B	500000	1	24	24	0.015	1000	density	effective
B	ARAHY.TIFRUNNER.GNM1.ANN1.7VP81J	0.357728	666	1.9127	0.2335	8	1.868	-0.000986847	0.187544	AraRoot35	PeanutIonome	B	500000	1	24	24	0.015	1000	density	effective
B	ARAHY.TIFRUNNER.GNM1.ANN1.YT3TY8	0.32884	666	1.75866	0.2335	8	1.868	-0.000986847	0.187544	AraRoot35	PeanutIonome	B	500000	1	24	24	0.015	1000	density	effective
B	500kb 2
B	ARAHY.TIFRUNNER.GNM1.ANN1.XP10PA	0.471457	2145	3.05442	0.256	1	0.256	-0.00150167	0.154844	AraRoot35	PeanutIonome	B	500000	2	24	24	0.049	1000	density	effective
Na	100kb 1
Na	ARAHY.TIFRUNNER.GNM1.ANN1.KQD4NT	0.843164	15	2.10789	0.2	2	0.4	0.0284767	0.386494	AraRoot35	PeanutIonome	Na	100000	1	6	6	0.224	250	density	effective
Na	ARAHY.TIFRUNNER.GNM1.ANN1.ZUT0YB	0.81701	15	2.04022	0.2	2	0.4	0.0284767	0.386494	AraRoot35	PeanutIonome	Na	100000	1	6	6	0.224	250	density	effective
Na	100kb 2
Na	ARAHY.TIFRUNNER.GNM1.ANN1.KQD4NT	0.788841	45	2.28279	0.22	1	0.22	-0.00173145	0.346319	AraRoot35	PeanutIonome	Na	100000	2	6	6	0.275	200	density	effective
Na	100kb 5
Na	ARAHY.TIFRUNNER.GNM1.ANN1.KQD4NT	0.909319	66	2.74833	0.2	1	0.2	0.00098081	0.330506	AraRoot35	PeanutIonome	Na	100000	5	6	6	0.22	250	density	effective
